# Supplementary material for: Exploring alternative pathways for the in vitro establishment of the HOPAC cycle for synthetic CO2 fixation
Source: PubMed Central journal article supplement — Sci Adv. 2023 Jun 14;9(24):eadh4299. doi: 10.1126/sciadv.adh4299 (PMC10266731; doi:10.1126/sciadv.adh4299), 2023-06-14
Supplement: sciadv.adh4299_sm.pdf [file sciadv.adh4299_sm.pdf]

Supplementary Materials for  
**Exploring alternative pathways for the in vitro establishment of the HOPAC  
cycle for synthetic CO<sub>2</sub> fixation**

Richard McLean *et al.*

Corresponding author: Tobias J. Erb, [toerb@mpi-marburg.mpg.de](mailto:toerb@mpi-marburg.mpg.de)

*Sci. Adv.* **9**, eadh4299 (2023)  
DOI: 10.1126/sciadv.adh4299

**The PDF file includes:**

Tables S1 to S8  
Figs. S1 to S26  
Legend for data S1  
Amino Acid Sequences  
References

**Other Supplementary Material for this manuscript includes the following:**

Data S1

**Supplemental Table 1.** Concentration of enzymes and cofactors in reductive pathway assays. Cells highlighted in grey are in mM, all others are in  $\mu$ M.

|                     | L-Glutamate | L-Alanine | Pcs | Pcl |
|---------------------|-------------|-----------|-----|-----|
| MOPS pH 7.5         | 50          | 50        | 50  | 50  |
| NaHCO <sub>3</sub>  | 50          | 50        | 50  | 50  |
| Formate             | 20          | 20        | 20  | 20  |
| NH <sub>4</sub> Cl  | 100         | 100       | -   | -   |
| ATP                 | -           | -         | 2   | 2   |
| NADPH               | 2           | 2         | 2   | 2   |
| L-Glutamate         | 250         | -         | -   | -   |
| L-Alanine           | -           | 250       | -   | -   |
| MgCl <sub>2</sub>   | -           | -         | 5   | 5   |
| CoA                 | -           | -         | 1   | 1   |
| PolyPO <sub>4</sub> | -           | -         | 25  | 25  |
| Gdh                 | 25          | -         | -   | -   |
| Adh                 | -           | 25        | -   | -   |
| Fdh                 | 30          | 30        | 30  | 30  |
| Ppk <sub>Sm</sub>   | -           | -         | 50  | 50  |
| Ppk <sub>Aj</sub>   | -           | -         | 50  | -   |
| Mcr <sub>CT</sub>   | 20          | 20        | -   | -   |
| GabT                | 60          | -         | -   | -   |
| $\beta$ apt         | -           | 60        | -   | -   |
| $\beta$ act         | 50          | 50        | -   | -   |
| $\beta$ Cal         | 50          | 50        | -   | -   |
| Ccr                 | 25          | 25        | -   | -   |
| Pcs                 | -           | -         | 150 | -   |
| Hps                 | -           | -         | -   | 50  |
| Ech                 | -           | -         | -   | 50  |
| Ccr                 | -           | -         | -   | 50  |
| Mcr                 | -           | -         | 50  | 50  |
| 3act                | -           | -         | -   | -   |
| Pcc                 | -           | -         | 150 | -   |
| Malonyl-CoA         | 1           | 1         | 1   | 1   |
| Acetyl-CoA          | 2           | 2         | -   | -   |

**Supplemental Table 2.** Concentration of enzymes and cofactors in oxidative pathway assays. Cells highlighted in grey are in mM, all others are in  $\mu\text{M}$ .

|                   | Mcd   | Scs   | Sct   | Sch   |
|-------------------|-------|-------|-------|-------|
| MOPS pH 7.5       | 50    | 50    | 50    | 50    |
| ATP               | -     | 2.5   | -     | 2.5   |
| ADP               | -     | 2.5   | -     | 2.5   |
| MgCl <sub>2</sub> | 5     | 5     | 5     | 5     |
| CoA               | 0     | 0.5   | 0     | 0.5   |
| AdoCbl            | 65    | 65    | 65    | 65    |
| FAD               | 30    | 30    | 30    | 30    |
| Ascorbic Acid     | 3.375 | 3.375 | 3.375 | 3.375 |
| Ferrocenium       | -     | 1.5   | 1.5   | 1.5   |
| Mcm               | 5     | 5     | 5     | 5     |
| Epi               | 5     | 5     | 5     | 5     |
| Mch               | 10    | 10    | 10    | 10    |
| Mcl               | 40    | 40    | 40    | 40    |
| Mcd               | 20    | -     | -     | -     |
| EtfAB             | 20    | -     | -     | -     |
| QO                | 60    | -     | -     | -     |
| SdhA/B            | -     | 100   | 100   | 100   |
| FumC              | -     | 10    | 10    | 10    |
| SucCD             | -     | 100   | -     | -     |
| Mcs               | -     | 100   | -     | 100   |
| Smt               | -     | -     | 20    | -     |
| Malate            | -     | -     | 0.2   | -     |
| Sch               | -     | -     | -     | 1     |
| Methylmalonyl-CoA | 1     | 1     | 1     | 1     |

**Supplemental Table 3.** Concentration of enzymes and cofactors in full HOPAC cycle assays. Cells highlighted in grey are in mM, all others are in  $\mu\text{M}$ .

|                                    | HOPAC <sub>Ccr</sub> 1.0 | HOPAC <sub>Ccr</sub> 2.0 | HOPAC <sub>Ccr</sub> 3.0 | HOPAC <sub>Ccr</sub> 3.1 | HOPAC <sub>Pcs/Pcc</sub> |
|------------------------------------|--------------------------|--------------------------|--------------------------|--------------------------|--------------------------|
| MOPS pH 7.5                        | 50                       | 50                       | 50                       | 50                       | 50                       |
| NaHCO <sub>3</sub> <sup>13</sup> C | 33                       | 33                       | 33                       | 33                       | 33                       |
| Formate <sup>13</sup> C            | 13                       | 13                       | 13                       | 13                       | 13                       |
| ATP                                | 3                        | 3                        | 3                        | 3                        | 3                        |
| NADPH                              | 3                        | 3                        | 3                        | 3                        | 3                        |
| NADH                               | 2                        | 2                        | 2                        | 2                        | 2                        |
| MgCl <sub>2</sub>                  | 5                        | 5                        | 5                        | 5                        | 5                        |
| CoA                                | 0.5                      | 0.5                      | 0.5                      | 0.5                      | 0.5                      |
| PolyPO <sub>4</sub>                | 13                       | 13                       | 13                       | 13                       | 13                       |
| AdoCbl                             | 65                       | 65                       | 65                       | 65                       | 65                       |
| FAD                                | 30                       | 30                       | 30                       | 30                       | 30                       |
| Ascorbic Acid                      | 3.375                    | 3.375                    | 3.375                    | 3.375                    | 3.375                    |
| CoADSR                             | 15                       | 15                       | 15                       | 15                       | 15                       |
| Carbonic Anhydrase                 | 5                        | 5                        | 5                        | 5                        | 5                        |
| SodB                               | 5                        | 5                        | 5                        | 5                        | 5                        |
| KatE                               | 35                       | 35                       | 35                       | 35                       | 35                       |
| Fdh                                | 50                       | 50                       | 50                       | 50                       | 50                       |
| Ppk <sub>Sm</sub>                  | 50                       | 50                       | 50                       | 50                       | 50                       |
| Ppk <sub>Aj</sub>                  | -                        | -                        | -                        | -                        | 20                       |
| Pcs                                | -                        | -                        | -                        | -                        | 50                       |
| Pcc                                | -                        | -                        | -                        | -                        | 20                       |
| Pcl                                | 40                       | 40                       | 40                       | 40                       | -                        |
| Ech                                | 20                       | 20                       | 20                       | 20                       | -                        |
| Ccr                                | 50                       | 50                       | 50                       | 50                       | -                        |
| Mcm                                | 5                        | 5                        | 5                        | 5 <sup>a</sup>           | 5 <sup>a</sup>           |
| Epi                                | 5                        | 5                        | 5                        | 5                        | 5                        |
| Mcd                                | 20                       | 20                       | 20                       | 20                       | 20                       |
| Etf                                | 20                       | 20                       | 20                       | 20                       | 20                       |
| EtfQO                              | -                        | 60                       | 60                       | 60                       | 60                       |
| Mch                                | 10                       | 10                       | 10                       | 10                       | 10                       |
| Mcl                                | 50                       | 50                       | 50                       | 50                       | 50                       |
| Grd                                | 30                       | 30                       | 30                       | 30                       | 30                       |
| Pcc <sub>(D407I)</sub>             | 20                       | 20                       | 20                       | 20                       | 20                       |
| Mcr                                | 5                        | 5                        | 5                        | 5                        | 5                        |
| MeaB                               | -                        | -                        | 50 <sup>b</sup>          | -                        | -                        |
| Acetyl-CoA                         | 200                      | 200                      | 200                      | 200                      | 200                      |

a. For Mcm supplementation, the assay was initiated with 1.25  $\mu\text{M}$  Mcm rather than the 5  $\mu\text{M}$  of other assays. Additional aliquots of 1.25  $\mu\text{M}$  (adjusted to the new volume after time points were removed) until a net concentration of 5  $\mu\text{M}$  had been added. b. For assays including the chaperone MeaB, Mcm was pre-incubated with MeaB to allow interaction to occur prior to exposure to methylmalonyl-CoA.

**Supplemental Table 4.** Concentrations for METIS optimization. Values are  $\mu\text{M}$  except for shaded cells which are  $\text{mM}$ .

|                        |      |       |      |       |      |
|------------------------|------|-------|------|-------|------|
| MOPS                   | 25   | 68.75 | 113  | 156.3 | 200  |
| ATP                    | 1    | 3.25  | 5.5  | 7.75  | 10   |
| GTP                    | 1    | 4     | 7    | 10    |      |
| NADPH                  | 1    | 3.25  | 5.5  | 7.75  | 10   |
| NADH                   | 1    | 4     | 7    | 10    |      |
| MgCl <sub>2</sub>      | 0    | 25    | 50   | 75    | 100  |
| CoA                    | 0    | 0.5   | 1    | 1.5   | 2    |
| NaHCO <sub>3</sub>     | 25   | 67.5  | 113  | 157.5 | 200  |
| Formate                | 10   | 32.5  | 55   | 77.5  | 100  |
| CP                     | 2.5  | 10    | 30   | 60    |      |
| B12                    | 0.1  | 0.325 | 0.55 | 0.8   | 1    |
| FAD                    | 0.1  | 0.325 | 0.55 | 0.8   | 1    |
| Ascorbate              | 0    | 2.5   | 5    | 7.5   | 10   |
| Dsr                    | 0.3  | 2.7   | 5    | 7.4   | 9.75 |
| Carbonic Anhydrase     | 0.25 | 0.5   | 0.75 | 1     |      |
| SOD                    | 0.25 | 0.5   | 0.75 | 1     |      |
| KatE                   | 1.4  | 3.4   | 5.4  | 7.5   | 9.5  |
| Fdh                    | 3.3  | 8.4   | 13.4 | 18.4  | 23.4 |
| Creatine Kinase        | 0.4  | 1.2   | 2.4  | 3.4   |      |
| Pcl                    | 1.5  | 6.1   | 12.2 | 18.3  | 24.4 |
| Ech                    | 1.4  | 2.3   | 3.2  | 4.1   | 4.9  |
| Ccr                    | 1.6  | 2.4   | 3.1  | 3.9   | 4.7  |
| Mcm                    | 2.1  | 4.2   | 6.3  | 8.5   |      |
| MeaB                   | 1.9  | 23.3  | 48.5 | 73.8  | 99.1 |
| Epi                    | 0.78 | 2.3   | 4.6  | 7     | 9.3  |
| Mcd                    | 2.3  | 25.4  | 48.5 | 99.3  |      |
| Etf                    | 3.9  | 27    | 50   | 73.2  | 96.3 |
| QO                     | 5.8  | 29.1  | 52.3 | 75.6  | 98.9 |
| Mch                    | 0.47 | 2.8   | 5.2  | 7.5   | 9.8  |
| Mcl                    | 2.8  | 5.6   | 8.4  |       |      |
| PCC <sub>(D4071)</sub> | 0.8  | 3.3   | 5.7  | 8.2   | 9.8  |
| Mcr                    | 1.2  | 3.7   | 6.1  | 9.7   |      |
| Grd                    | 5.6  | 9     | 12.4 | 15.8  | 19.2 |
| AhpFC                  | 0.9  | 2.9   | 5.2  | 7.5   | 9.9  |
| CoAE                   | 0.75 | 3     | 5.25 | 7.5   | 9.75 |
| YjeF                   | 0.9  | 3.4   | 5.1  | 6.8   | 9.4  |

**Supplemental Table 5.** Parameters used for the detection of glycolate by LCMS.

| Compound | Quantifier | Collision Energy | Qualifier | Collision Energy | Dwell | Fragmenter voltage | Cell Accelerator Voltage |
|----------|------------|------------------|-----------|------------------|-------|--------------------|--------------------------|
| X1       | 75→75      | 0                | 75→47     | 9                | 150   | 380                | 5                        |
| X2       | 77→77      | 0                | 77→48     | 9                | 150   | 380                | 5                        |

**Supplemental Table 6. Enzyme List**

| Abr.       | Enzyme Name                             | Host Organism                   | Primary reaction in this study                                                                                                                     | K <sub>m</sub>                                       | V <sub>max</sub><br>(U mg <sup>-1</sup> ) | Additional Data                                                                                             |
|------------|-----------------------------------------|---------------------------------|----------------------------------------------------------------------------------------------------------------------------------------------------|------------------------------------------------------|-------------------------------------------|-------------------------------------------------------------------------------------------------------------|
| Ccr        | crotonyl-CoA carboxylase/reductase      | <i>Methylorubrum extorquens</i> | acrylyl-CoA + CO <sub>2</sub> + NADPH = (2S)-methylmalonyl-CoA + NADP <sup>+</sup>                                                                 | 780 μM acrylyl-CoA<br>210 μM NADPH                   | 274.4                                     |                                                                                                             |
| Epi        | methylmalonyl-CoA epimerase             | <i>Cereibacter sphaeroides</i>  | (2S)-methylmalonyl-CoA = (2R)-methylmalonyl-CoA                                                                                                    | 80 μM methylmalonyl-CoA                              | 440 <sup>27</sup>                         |                                                                                                             |
| Mcm        | methylmalonyl-CoA mutase                | <i>Cereibacter sphaeroides</i>  | (2R)-methylmalonyl-CoA = succinyl-CoA                                                                                                              | 19 μM methylmalonyl-CoA                              | 450                                       |                                                                                                             |
| PmMcd      | methylsuccinyl-CoA dehydrogenase        | <i>Pseudomonas migulae</i>      | succinyl-CoA + FAD = fumaryl-CoA + FADH <sub>2</sub>                                                                                               | 78 μM succinyl-CoA                                   | 5.2                                       | 49 Umg <sup>-1</sup><br>81 μM methylsuccinyl-CoA                                                            |
| CsMcd      | methylsuccinyl-CoA dehydrogenase        | <i>Cereibacter sphaeroides</i>  | succinyl-CoA + FAD = fumaryl-CoA + FADH <sub>2</sub>                                                                                               | 94 μM succinyl-CoA                                   | 0.82                                      | 71 Umg <sup>-1</sup><br>41 μM methylsuccinyl-CoA                                                            |
| SaMcd      | methylsuccinyl-CoA dehydrogenase        | <i>Streptomyces albus</i>       | succinyl-CoA + FAD = fumaryl-CoA + FADH <sub>2</sub>                                                                                               | 39 μM succinyl-CoA                                   | 0.29                                      | 17 Umg <sup>-1</sup><br>12 μM methylsuccinyl-CoA                                                            |
| WmMcd      | methylsuccinyl-CoA dehydrogenase        | <i>Wenxinia marina</i>          | succinyl-CoA + FAD = fumaryl-CoA + FADH <sub>2</sub>                                                                                               | 30 μM succinyl-CoA                                   | 0.35                                      | 86 Umg <sup>-1</sup><br>29 μM methylsuccinyl-CoA                                                            |
| CvMcd      | methylsuccinyl-CoA dehydrogenase        | <i>Caulobacter vibrioides</i>   | succinyl-CoA + FAD = fumaryl-CoA + FADH <sub>2</sub>                                                                                               | 61 μM succinyl-CoA                                   | 1.0                                       | 131 Umg <sup>-1</sup><br>55 μM methylsuccinyl-CoA                                                           |
| EIMcd      | methylsuccinyl-CoA dehydrogenase        | <i>Erythrobacter litoralis</i>  | succinyl-CoA + FAD = fumaryl-CoA + FADH <sub>2</sub>                                                                                               | 32 μM succinyl-CoA                                   | 2.8                                       | 18 Umg <sup>-1</sup><br>67 μM methylsuccinyl-CoA                                                            |
| FsMcd      | methylsuccinyl-CoA dehydrogenase        | <i>Frankia sp.</i>              | succinyl-CoA + FAD = fumaryl-CoA + FADH <sub>2</sub>                                                                                               | 38 μM succinyl-CoA                                   | 1.7                                       | 39 Umg <sup>-1</sup><br>43 μM methylsuccinyl-CoA                                                            |
| PdMcd      | methylsuccinyl-CoA dehydrogenase        | <i>Paracoccus denitrificans</i> | succinyl-CoA + FAD = fumaryl-CoA + FADH <sub>2</sub>                                                                                               | 101 μM succinyl-CoA                                  | 1.7                                       | 88 Umg <sup>-1</sup><br>88 μM methylsuccinyl-CoA                                                            |
| HrMcd      | methylsuccinyl-CoA dehydrogenase        | Bacterium HR19                  | succinyl-CoA + FAD = fumaryl-CoA + FADH <sub>2</sub>                                                                                               | 99 μM succinyl-CoA                                   | 1.4                                       | 1.1 Umg <sup>-1</sup><br>723 μM methylsuccinyl-CoA                                                          |
| Mch        | mesaconyl-CoA hydratase                 | <i>Cereibacter sphaeroides</i>  | fumaryl-CoA + H <sub>2</sub> O = malyl-CoA                                                                                                         | 280 μM fumaryl-CoA                                   | 1.7x10 <sup>3</sup>                       | 18 Umg <sup>-1</sup><br>80 μM (S)-malyl-CoA<br><br>59 Umg <sup>-1</sup><br>210 μM (2R,3S)-β-methylmalyl-CoA |
| Mcl        | malyl-CoA lyase                         | <i>Cereibacter sphaeroides</i>  | malyl-CoA = acetyl-CoA + glyoxylate                                                                                                                | 40 μM (S)-malyl-CoA                                  | 6.3                                       | 9.7 Umg <sup>-1</sup><br>110 μM (2R,3S)-β-methylmalyl-CoA                                                   |
| PCC(D4071) | propionyl-CoA carboxylase               | <i>Methylorubrum extorquens</i> | acetyl-CoA + HCO <sub>3</sub> <sup>-</sup> + ATP = malonyl-CoA + ADP + P <sub>i</sub>                                                              | 560 μM acetyl-CoA<br>50 μM ATP                       | 15.5                                      | 28 Umg <sup>-1</sup><br>140 μM propionyl-CoA                                                                |
| Mcr        | malonyl-CoA reductase                   | <i>Chloroflexus aurantiacus</i> | malonyl-CoA + NADPH = malonic semialdehyde + NADP <sup>+</sup> + CoA<br><br>malonic semialdehyde + NADPH = 3-hydroxypropionate + NADP <sup>+</sup> | 1.3 μM malonyl-CoA<br>10 μM NADPH                    | 24                                        |                                                                                                             |
| Mcr-CT     | Malonyl-CoA reductase c-terminal domain | <i>Chloroflexus aurantiacus</i> | malonyl-CoA + NADPH = malonic semialdehyde + NADP <sup>+</sup> + CoA                                                                               | 8 μM malonyl-CoA<br>39 μM NADPH                      | 49                                        |                                                                                                             |
| Pcl        | propionyl-CoA ligase                    | <i>Cupriavidus necator</i>      | 3-hydroxypropionate + ATP + CoA = 3-hydroxypropionyl-CoA + ADP + P <sub>i</sub>                                                                    | 9.9 mM 3-hydroxypropionate<br>96 μM CoA<br>19 μM ATP | 2.6                                       |                                                                                                             |

|      |                                                 |                                 |                                                                                                                                                                          |                                                                      |                    |                                                                      |
|------|-------------------------------------------------|---------------------------------|--------------------------------------------------------------------------------------------------------------------------------------------------------------------------|----------------------------------------------------------------------|--------------------|----------------------------------------------------------------------|
| Ech  | enoyl-CoA hydratase                             | <i>Pseudomonas aeruginosa</i>   | 3-hydroxypropionyl-CoA =<br>acrylyl-CoA + H <sub>2</sub> O                                                                                                               | 330 μM acrylyl-CoA                                                   | 720                |                                                                      |
| Pcs  | propionyl-CoA synthetase                        | <i>Erythrobacter NAP1</i>       | 3-hydroxypropionate + CoA + ATP +<br>NADPH + HCO <sub>3</sub> <sup>-</sup> =<br>(2S)-methylmalonyl-CoA + AMP + PP <sub>i</sub><br>+ NADP <sup>+</sup> + H <sub>2</sub> O | 3-hydroxypropionate 85 μM<br>10 μM ATP<br>340 μM CoA<br>140 μM NADPH | 0.14               |                                                                      |
| Pcc  | propionyl-CoA carboxylase                       | <i>Methylorubrum extorquens</i> | propionyl-CoA + HCO <sub>3</sub> <sup>-</sup> + ATP =<br>(2S)-malonyl-CoA + ADP + P <sub>i</sub>                                                                         | 55 μM propionyl-CoA<br>330 μM ATP                                    | 22                 | 1.1 Umg <sup>-1</sup><br>270 μM acetyl-CoA                           |
| Smt  | succinyl-CoA:malate CoA<br>transferase          | <i>Chloroflexus aurantiacus</i> | succinyl-CoA + malate =<br>succinate + malyl-CoA                                                                                                                         | 0.96 mM succinyl-CoA<br>0.91 mM malate                               | 78                 |                                                                      |
| Sdh  | succinate dehydrogenase                         | <i>Escherichia coli</i>         | Succinate + FAD =<br>fumarate + FADH <sub>2</sub>                                                                                                                        | 63 μM succinate                                                      | 0.59               | 0.23 Umg <sup>-1</sup><br>86 μM succinate                            |
| βCal | β-alanyl-CoA:ammonia<br>lyase                   | <i>Stigmatella aurantiaca</i>   | β-alanyl-CoA =<br>acrylyl-CoA + NH <sub>3</sub>                                                                                                                          | 70 μM β-alanyl-CoA                                                   | 12                 |                                                                      |
| Gdh  | glutamate dehydrogenase                         | <i>Paracoccus denitrificans</i> | 2-oxoglutarate + NH <sub>3</sub> + NADPH =<br>L-glutamate + H <sub>2</sub> O + NADP <sup>+</sup>                                                                         | 390 μM 2-oxoglutarate<br>10.7 μM NADPH<br>86 mM NH <sub>4</sub>      | 48                 | 0.47 Umg <sup>-1</sup><br>490 μM glutamate<br>7 μM NADP <sup>+</sup> |
| Scs  | succinyl-CoA synthetase                         | <i>Escherichia coli</i>         | succinyl-CoA + ADP + P <sub>i</sub> =<br>succinate + CoA + ATP                                                                                                           | 250 μM succinate<br>4.0 μM CoA<br>70 μM ATP                          | 37.7 <sup>29</sup> |                                                                      |
| Sch  | succinyl-CoA hydrolase                          | <i>Mus musculus</i>             | succinyl-CoA + H <sub>2</sub> O =<br>succinate + CoA                                                                                                                     | 1.8 mM succinyl-CoA                                                  | 468                |                                                                      |
| GabT | 4-aminobutyrate-2-<br>oxoglutarate transaminase | <i>Escherichia coli</i>         | malonic semialdehyde + L-glutamate =<br>2-oxoglutarate + β-alanine                                                                                                       | 98 μM malonic semialdehyde<br>7 μM L-glutamate                       | 1.1                |                                                                      |



**Supplementary Table 7.** X-ray diffraction data collection and model refinement statistics

| Crystal                                             | McdPm with bound FAD and (2S)-methylsuccinyl-CoA |
|-----------------------------------------------------|--------------------------------------------------|
| PDB ID                                              | 8CIW                                             |
| <b>Data collection</b>                              |                                                  |
| Beamline                                            | DESY PETRA III P13                               |
| Wavelength (Å)                                      | 0.9763                                           |
| Space Group                                         | C 2 2 2 <sub>1</sub>                             |
| Unit cell dimensions                                |                                                  |
| a, b, c (Å)                                         | 139.80, 169.56, 118.39                           |
| α, β, γ (°)                                         | 90.00, 90.00, 90.00                              |
| Resolution (Å)                                      | 25.01 – 1.93 (2.03 – 1.93)                       |
| Unique reflections                                  | 105292 (15053)                                   |
| Multiplicity                                        | 13.2 (12.7)                                      |
| Completeness (%)                                    | 99.7 (98.6)                                      |
| <i>I</i> / <i>σ</i> <i>I</i>                        | 14.6 (2.3)                                       |
| <i>R</i> <sub>merge</sub>                           | 0.119 (1.165)                                    |
| <i>R</i> <sub>pim</sub>                             | 0.034 (0.337)                                    |
| CC <sub>1/2</sub>                                   | 0.999 (0.892)                                    |
| <b>Refinement</b>                                   |                                                  |
| <i>R</i> <sub>work</sub> / <i>R</i> <sub>free</sub> | 0.1739 / 0.2027                                  |
| RMS bonds                                           | 0.0086                                           |
| RMS angles                                          | 0.967                                            |
| Ramachandran                                        |                                                  |
| favored (%)                                         | 98.28                                            |
| outliers (%)                                        | 0.00                                             |
| Rotamer outliers (%)                                | 0.47                                             |
| Number of atoms                                     | 9225                                             |
| Protein                                             | 8370                                             |
| Ligands                                             | 288                                              |
| Solvent                                             | 567                                              |
| Average B-factor                                    | 39.78                                            |
| Protein                                             | 39.51                                            |
| Ligands                                             | 40.90                                            |
| Solvent                                             | 43.27                                            |

Values in parentheses are for highest-resolution shell.

**Supplementary Table 8.** CO<sub>2</sub> fixation comparison of the HOPAC cycle with other synthetic cycles and the Calvin cycle.

| Cycle | Rate<br>(nmol CO <sub>2</sub> min <sup>-1</sup> mg <sup>-1</sup><br>CO <sub>2</sub> -fixing enzymes) | ATP<br>Requirements | NAD(P)H<br>Requirements | Cycle Product              | Reference     |
|-------|------------------------------------------------------------------------------------------------------|---------------------|-------------------------|----------------------------|---------------|
| HOPAC | 2.4                                                                                                  | 2                   | 3                       | Glyoxylate                 | This study    |
| CETCH | 5                                                                                                    | 1                   | 4                       | Glyoxylate                 | <sup>1</sup>  |
| THETA | 2.7                                                                                                  | 4                   | 5                       | Acetyl-CoA                 |               |
| POAP  | 8.0                                                                                                  | 3                   | 1                       | Oxalate                    | <sup>50</sup> |
| CBB   | 1-3                                                                                                  | 9                   | 6                       | glyceraldehyde-3-phosphate | <sup>51</sup> |

# Supplementary Figures

## Supplemental Figure 1. Ccr Kinetics

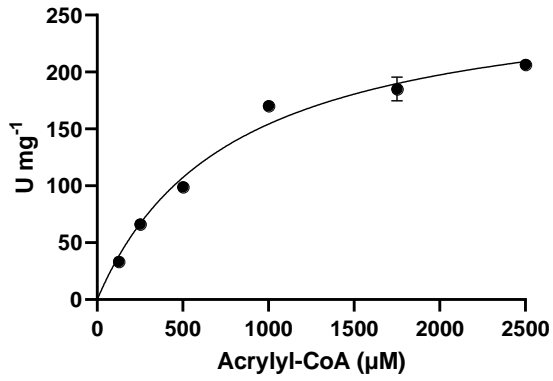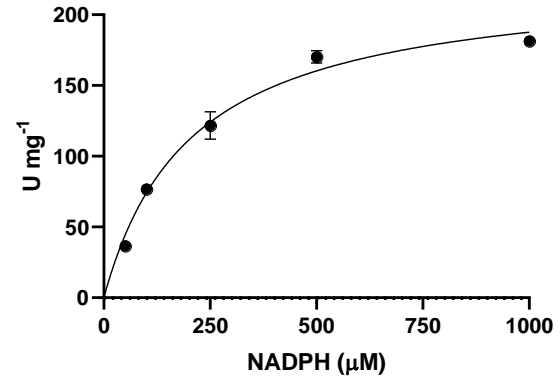

## Supplemental Figure 2. Epi Activity

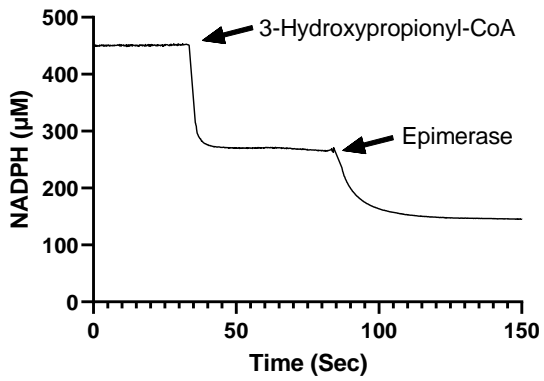

## Supplemental Figure 3. Mcm Kinetics

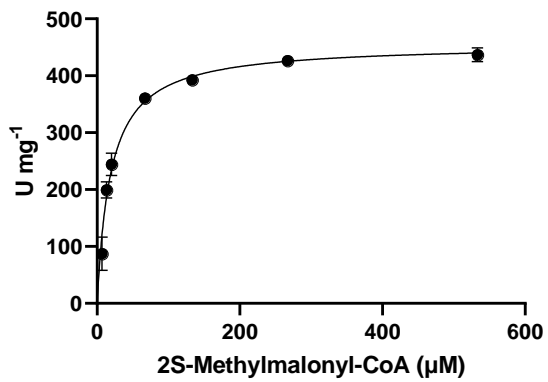

### Supplemental Figure 4. Mch Kinetics

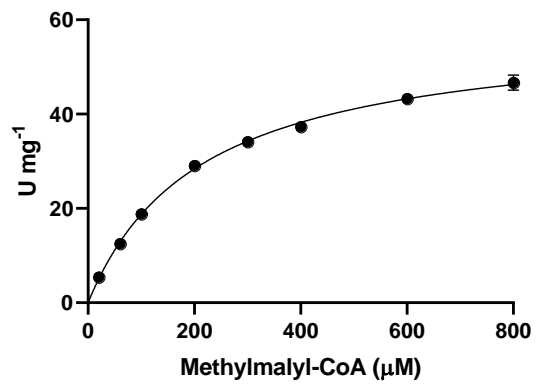

### Supplemental Figure 5. Mcl Kinetics

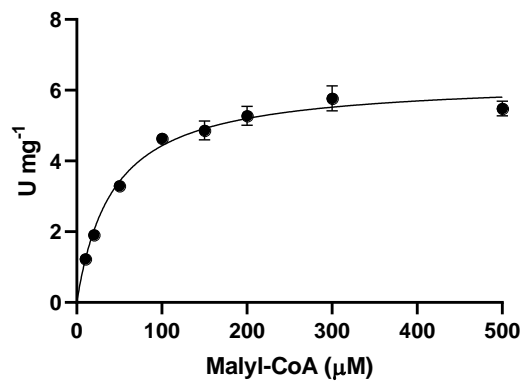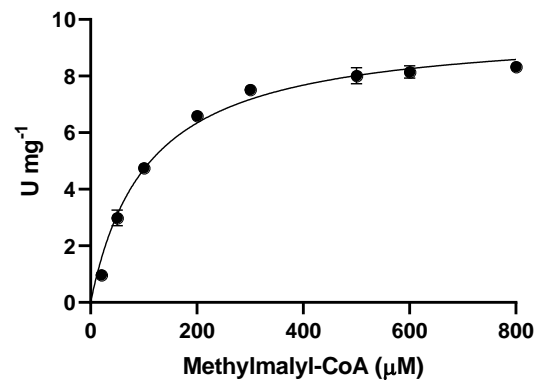

Supplemental Figure 6. Pcc(D4071) Kinetics

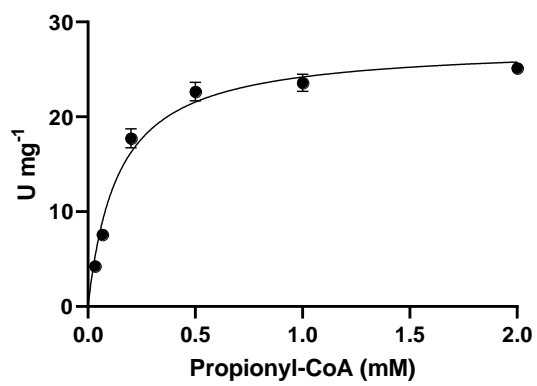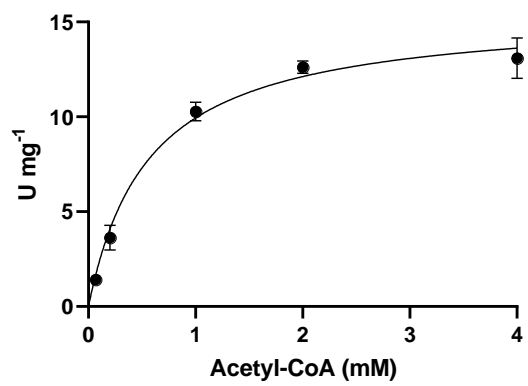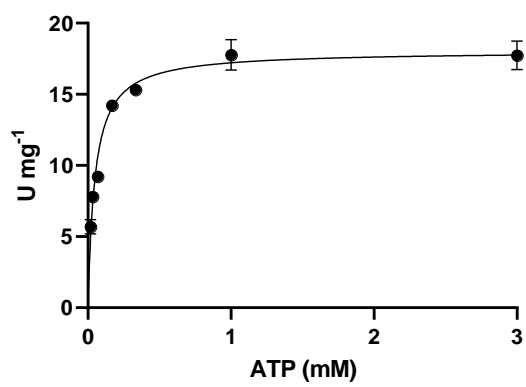

## Supplemental Figure 7. Pcs Kinetics

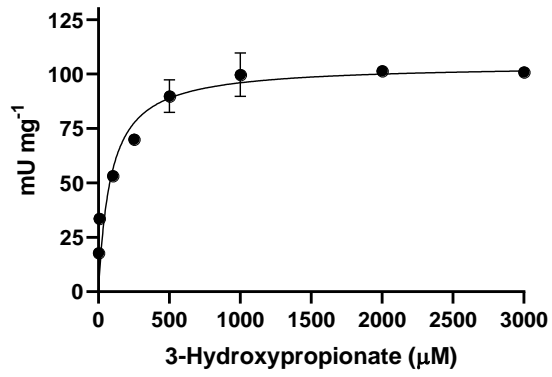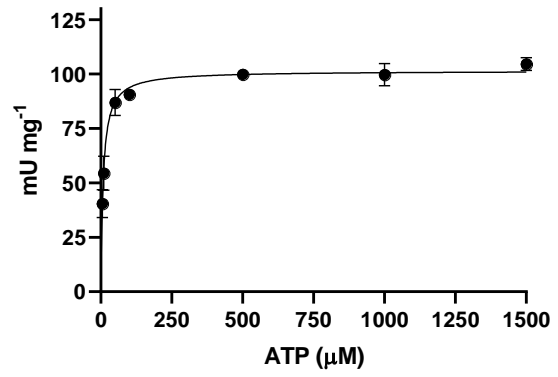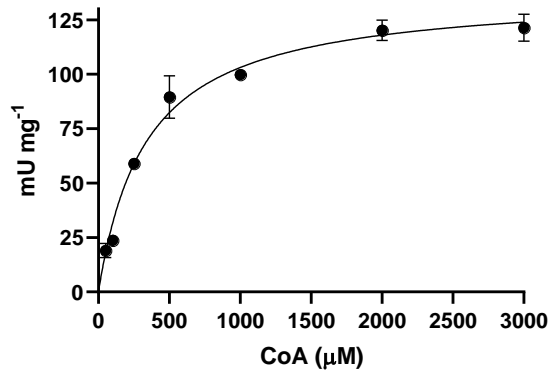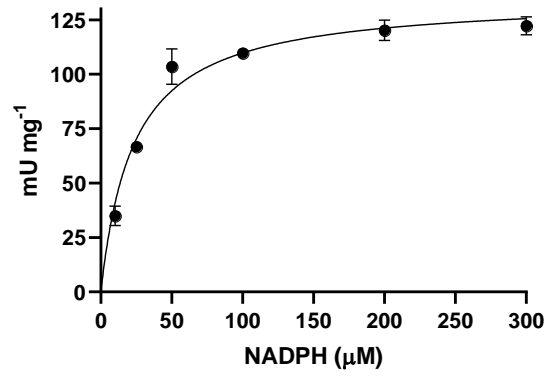

### Supplemental Figure 8. Pcc Kinetics

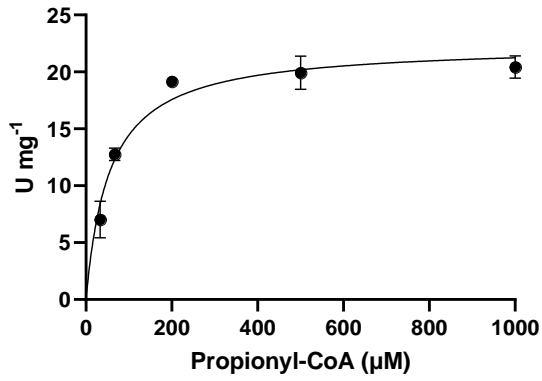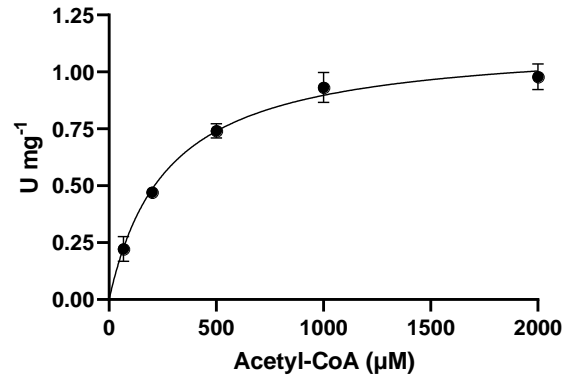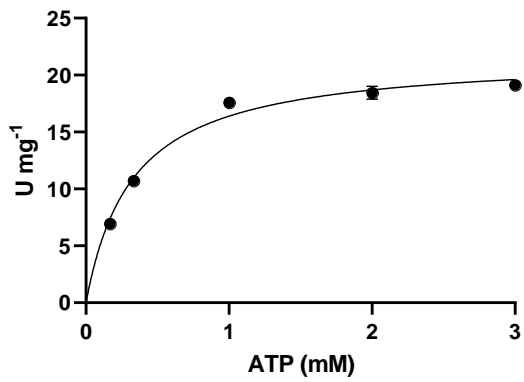

### Supplemental Figure 9. βapt Activity

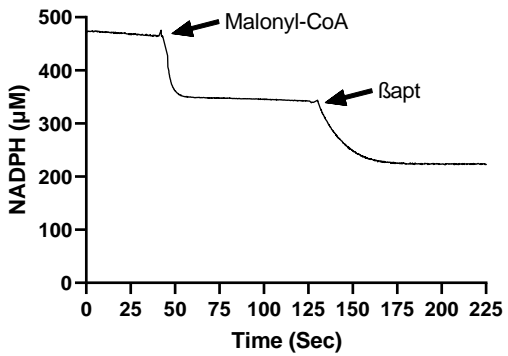

### Supplemental Figure 10. Gdh Kinetics

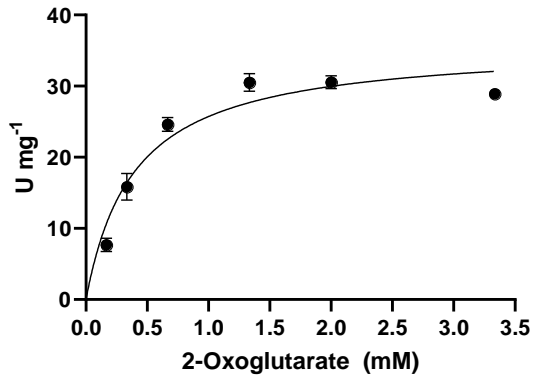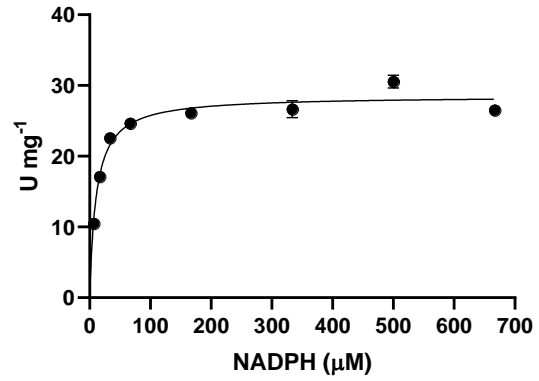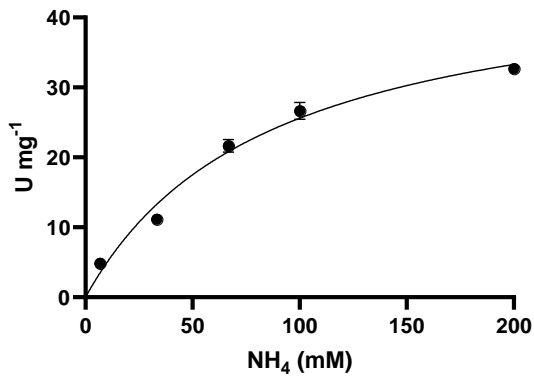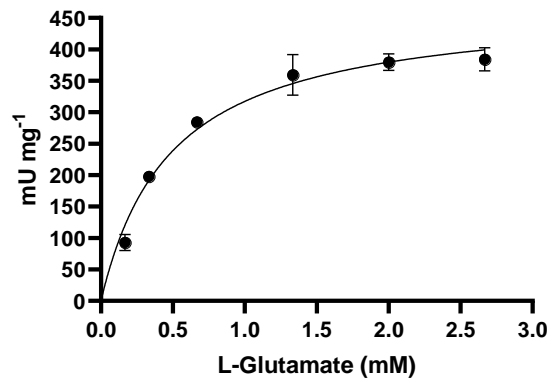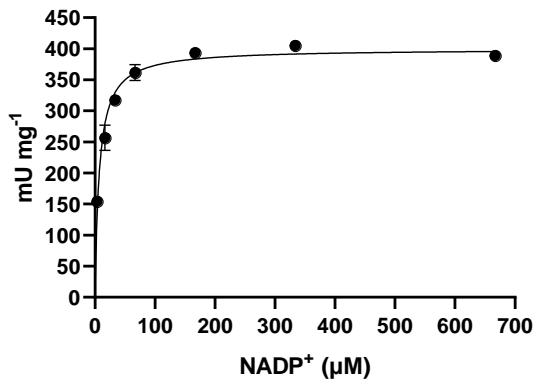

**Supplemental Figure 11.** Mcd kinetics on methylsuccinyl-CoA **A.** PmMcd **B.** CsMcd **C.** SaMcd **D.** WmMcd **E.** CvMcd **F.** EIMcd **G.** FsMcd **H.** PdMcd **I.** HrMcd.

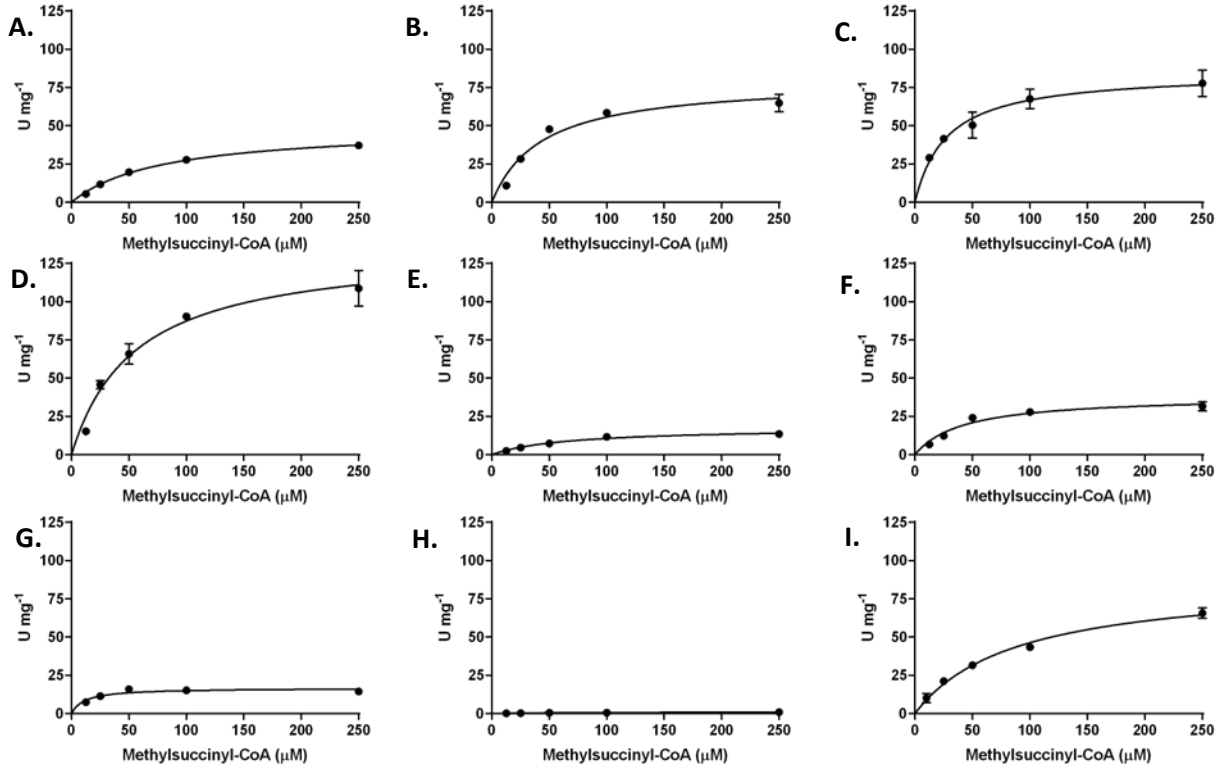



**Supplemental Figure 12.** Mcd kinetics on succinyl-CoA **A.** PmMcd **B.** CsMcd **C.** SaMcd **D.** WmMcd **E.** CvMcd **F.** EIMcd **G.** FsMcd **H.** PdMcd **I.** HrMcd.

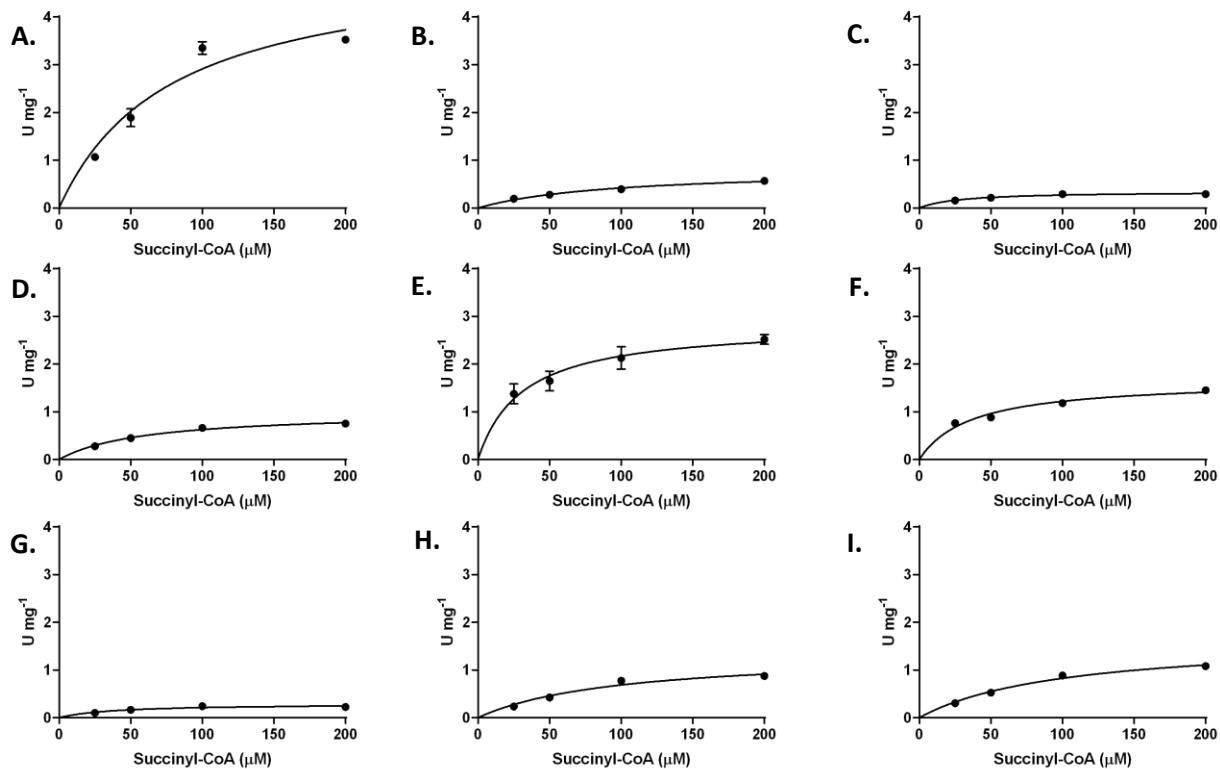

**Supplemental Figure 13.** Acyl-CoA synthetase activity screen. WP\_081225789.1 = propionyl-CoA synthetase from *C. necator*. WP\_007165025.1 and WP\_007166279.1 = acetyl-CoA synthetase from *Erythrobacter* sp, NAP1. WP\_012215692.1 = 3-hydroxypropionyl-CoA from *Nitrosopumilus maritimus*. WP\_043816650.1 = butyryl-CoA synthetase from *Deinococcus maricopensis*. WP\_001381688.1 = propionyl-CoA synthetase from *Escherichia coli*. WP\_112906837.1 = malonyl-CoA synthetase from *Rhizobium leguminosarum*. WP\_135559925.1/WP\_097814658.1 = succinyl-CoA synthetase from *Escherichia coli*. WP\_041443414.1 = phenylacetyl-CoA synthetase from *Thermus thermophilus*. WP\_169132234.1 = phenylacetyl-CoA synthetase from *Aromatoleum evansii*.

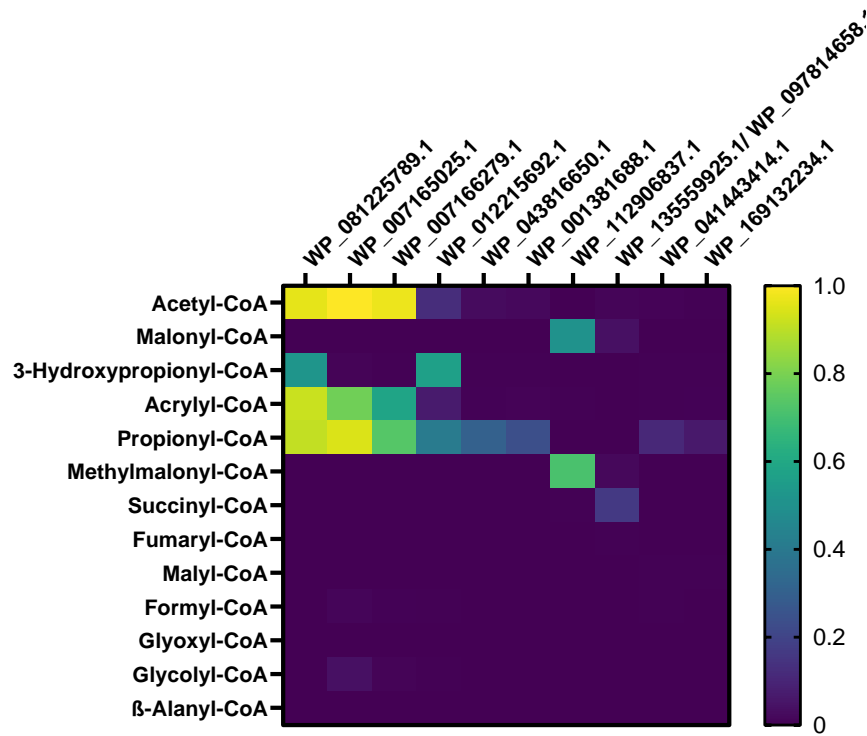

**Supplemental Figure 14.** Acyl-CoA transferase screen. **A.** Act, **B.** Pct, **C.** βct.

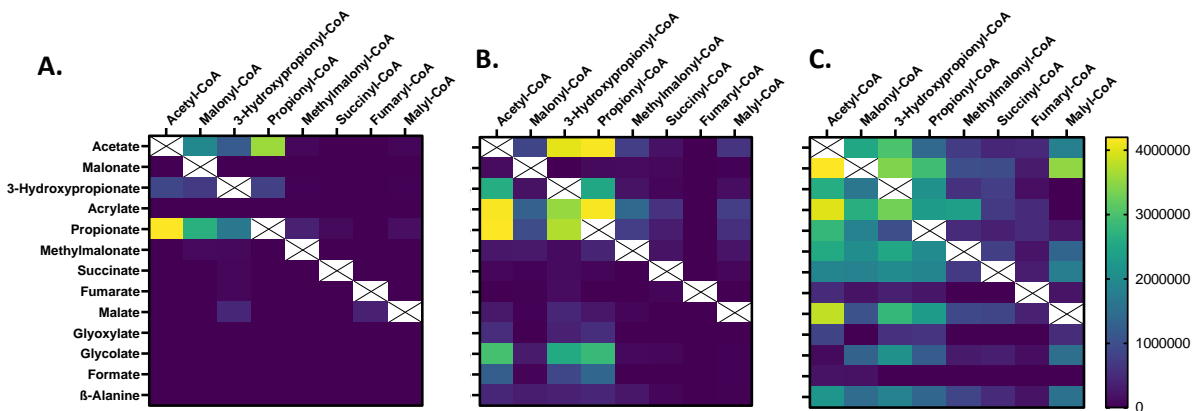

**Supplemental Figure 15.** Effect of Etf/EtfQO on Mcd activity. Succinyl-CoA (circles) is oxidized to fumaryl-CoA (squares) by Mcd in the presence of **A.** ferrocenium, **B.** O<sub>2</sub>, **C.** Etf, **D.** Etf and EtfQO.

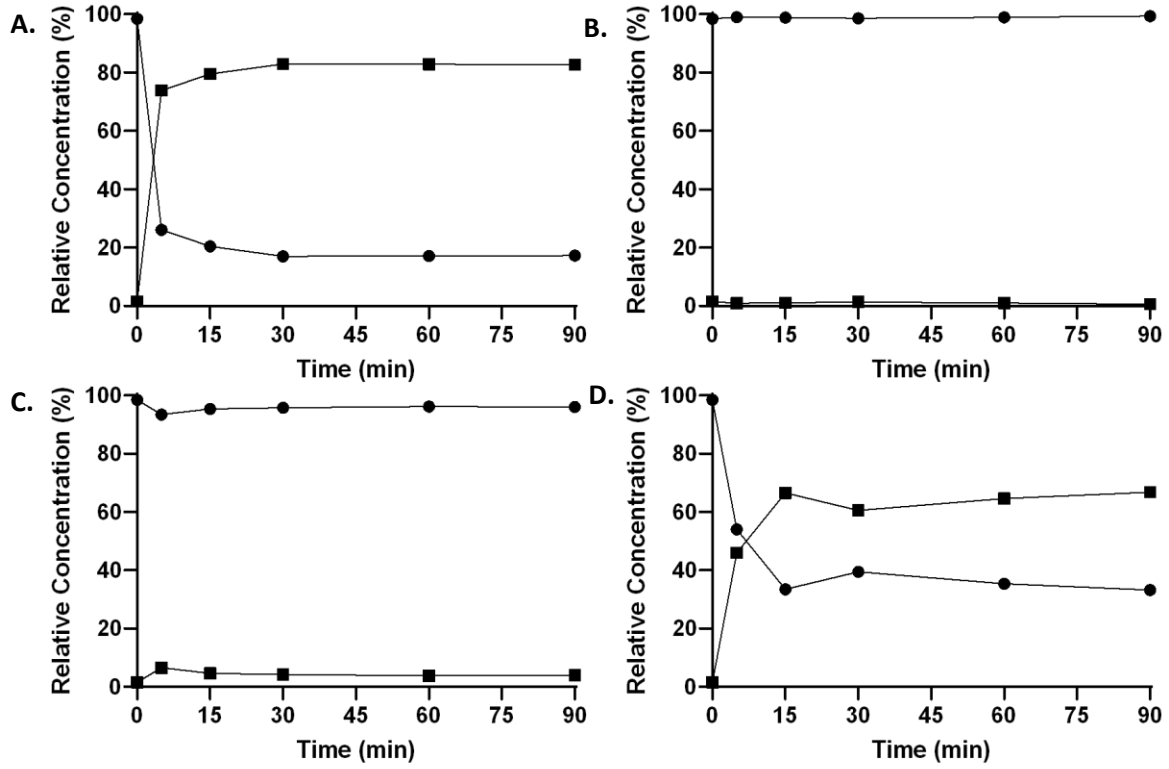

**Supplemental Figure 16.** Effect of MeaB on extending Mcm lifespan. Methylmalonyl-CoA was incubated alone (triangles), with Mcm (circles), or with Mcm and MeaB (squares) for 90 minutes. Samples were removed and incubated with Scr and NADPH to remove succinyl-CoA. When Mcm is inactivated, succinyl-CoA is removed, and the pool of methylmalonyl-CoA is maintained. When it remains active, succinyl-CoA is regenerated as it is consumed by Scr.

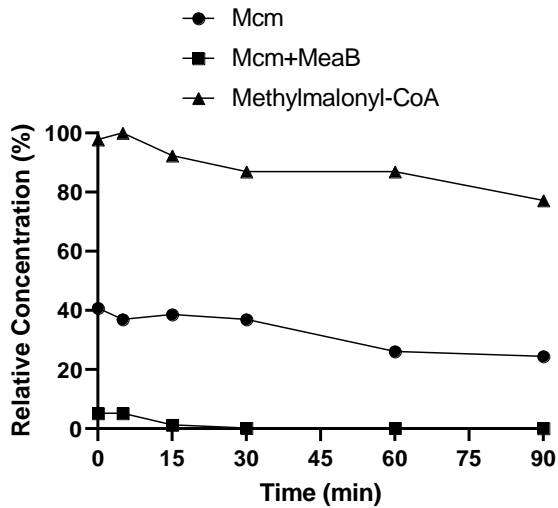

**Supplemental Figure 17.** Activity of CoAE on **A.** acetyl-CoA. **B.** malonyl-CoA. **C.** 3-hydroxypropionyl-CoA. **D.** propionyl-CoA. **E.** methylmalonyl-CoA. **F.** fumaryl-CoA. **G.** (S)-malyl-CoA. **H.**  $\beta$ -alanyl-CoA. Acyl-CoAs (circles) are dephosphorylated (squares) then phosphorylated by CoAE.

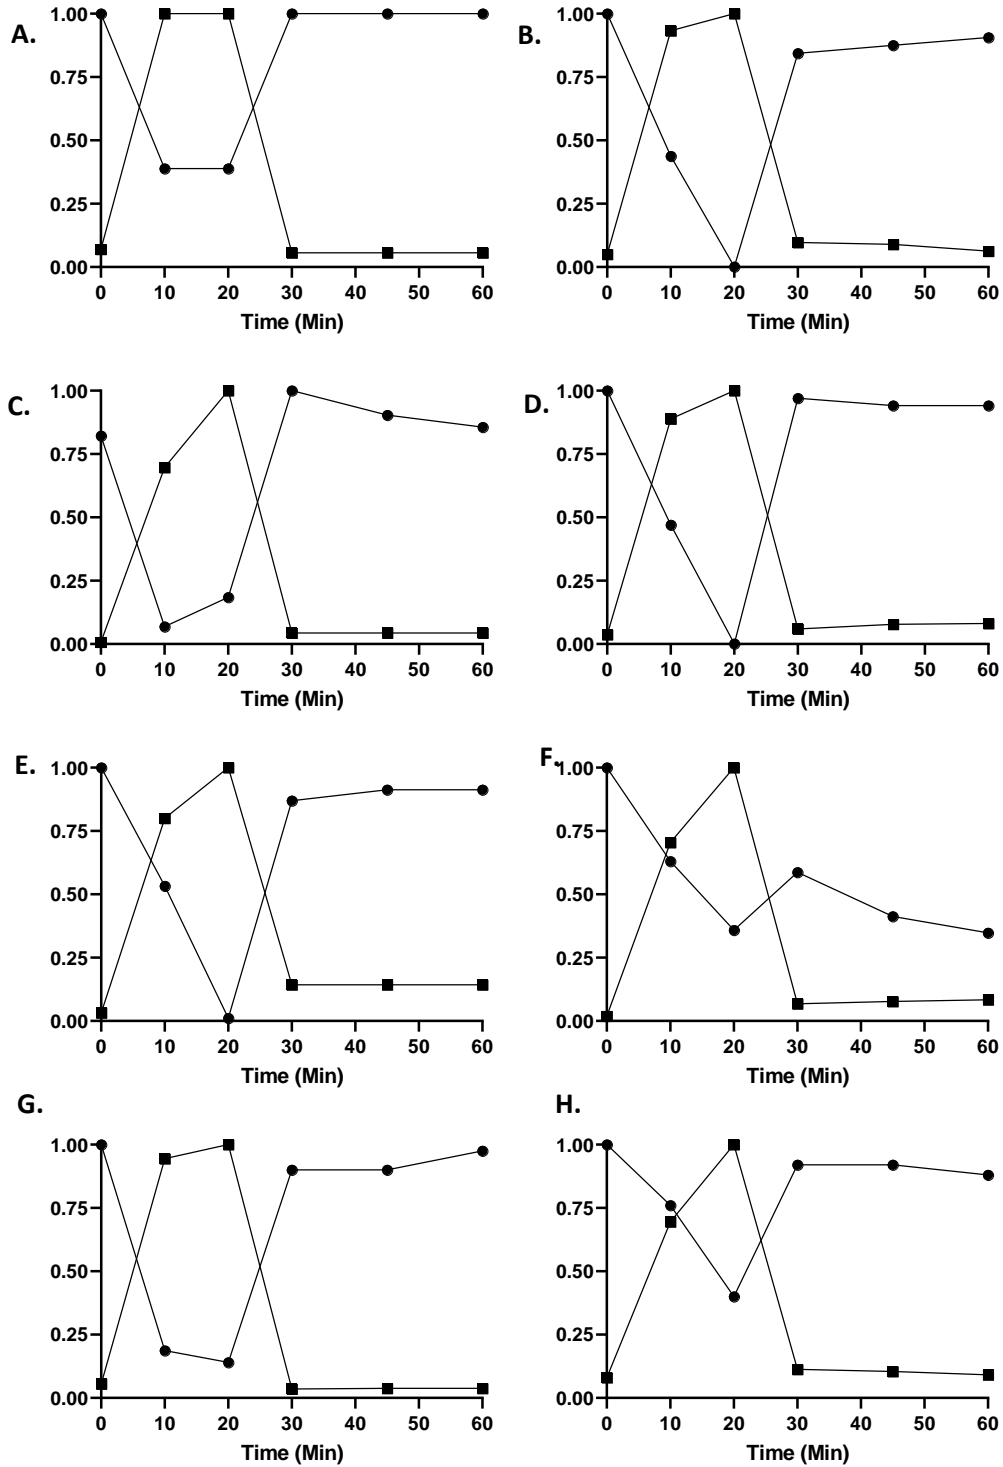

**Supplemental Figure 18.** Validation of the  $\beta$ -alanine route utilizing  $\beta$ apt and Adh. Values refer to relative concentrations of intermediates as determined by LCMS.

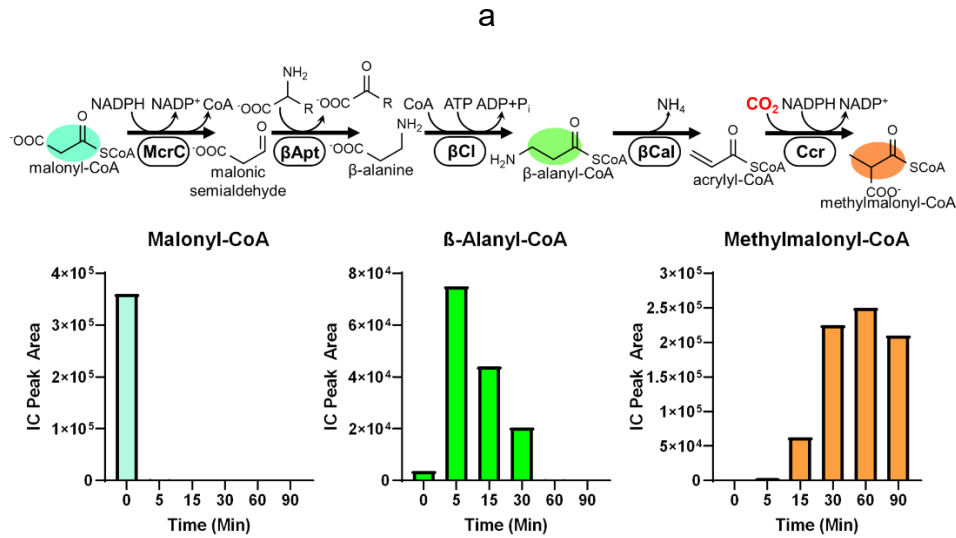

**Supplemental Figure 19.** Validation of the 3OH route utilizing Pcs and Pcc. Values refer to relative concentrations of intermediates as determined by LCMS.

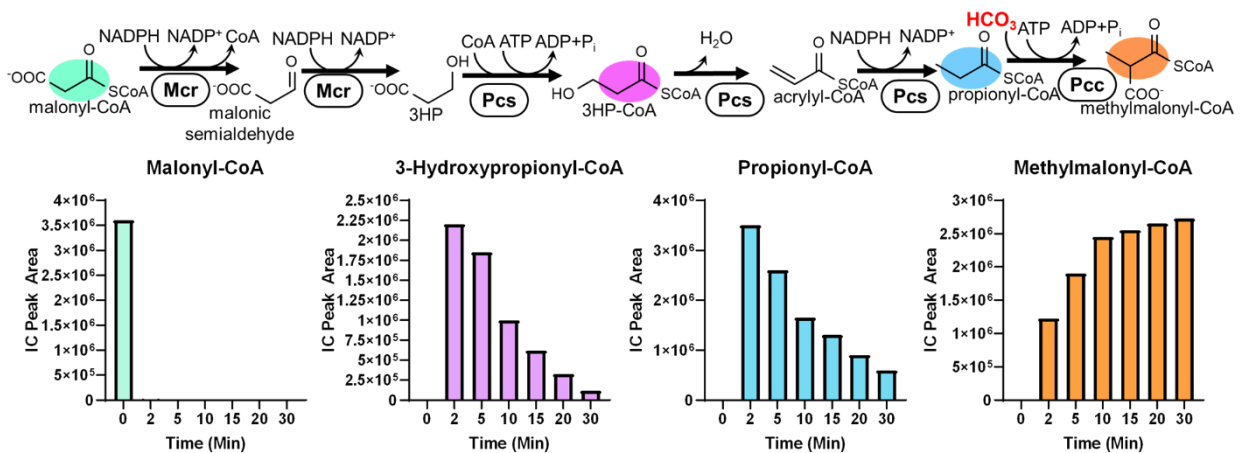

**Supplemental Figure 20.** Expected  $^{13}\text{C}$ -label incorporation of the HOPAC cycle from  $^{13}\text{CO}_3^-$  and  $^{13}\text{CO}_2$ . The reaction is started with  $^{12}\text{C}$  acetyl-CoA, and the first carboxylation incorporates a single  $^{13}\text{C}$  from  $^{13}\text{CO}_3^-$  labelled in the first cycle with a green circle. A second  $^{13}\text{C}$  is incorporated in the reductive carboxylation step, this time from  $^{13}\text{CO}_2$ , labelled with a purple circle, provided by carbonic anhydrase. At the completion of the first turn of the cycle, malyl-CoA is cleaved into glyoxylate containing the reductively carboxylated  $^{13}\text{C}$ , and acetyl-CoA containing the originally fixed  $^{13}\text{C}$ . The second turn of the cycle begins with this singly labelled acetyl-CoA, and the process is repeated. The product of the second turn of the cycle is twice labelled acetyl-CoA, at the completion of the third turn, the acetyl-CoA is again twice labelled making any further cycling indiscriminable. The process is identical when Pcs or  $\beta$ -alanine variants are used, but the method loses utility in the free acid path due to the symmetry of fumarate which causes two pools of malate to be formed in the second turn of the cycle, labelled at the 1,2,4 or 1,3,4 carbons.

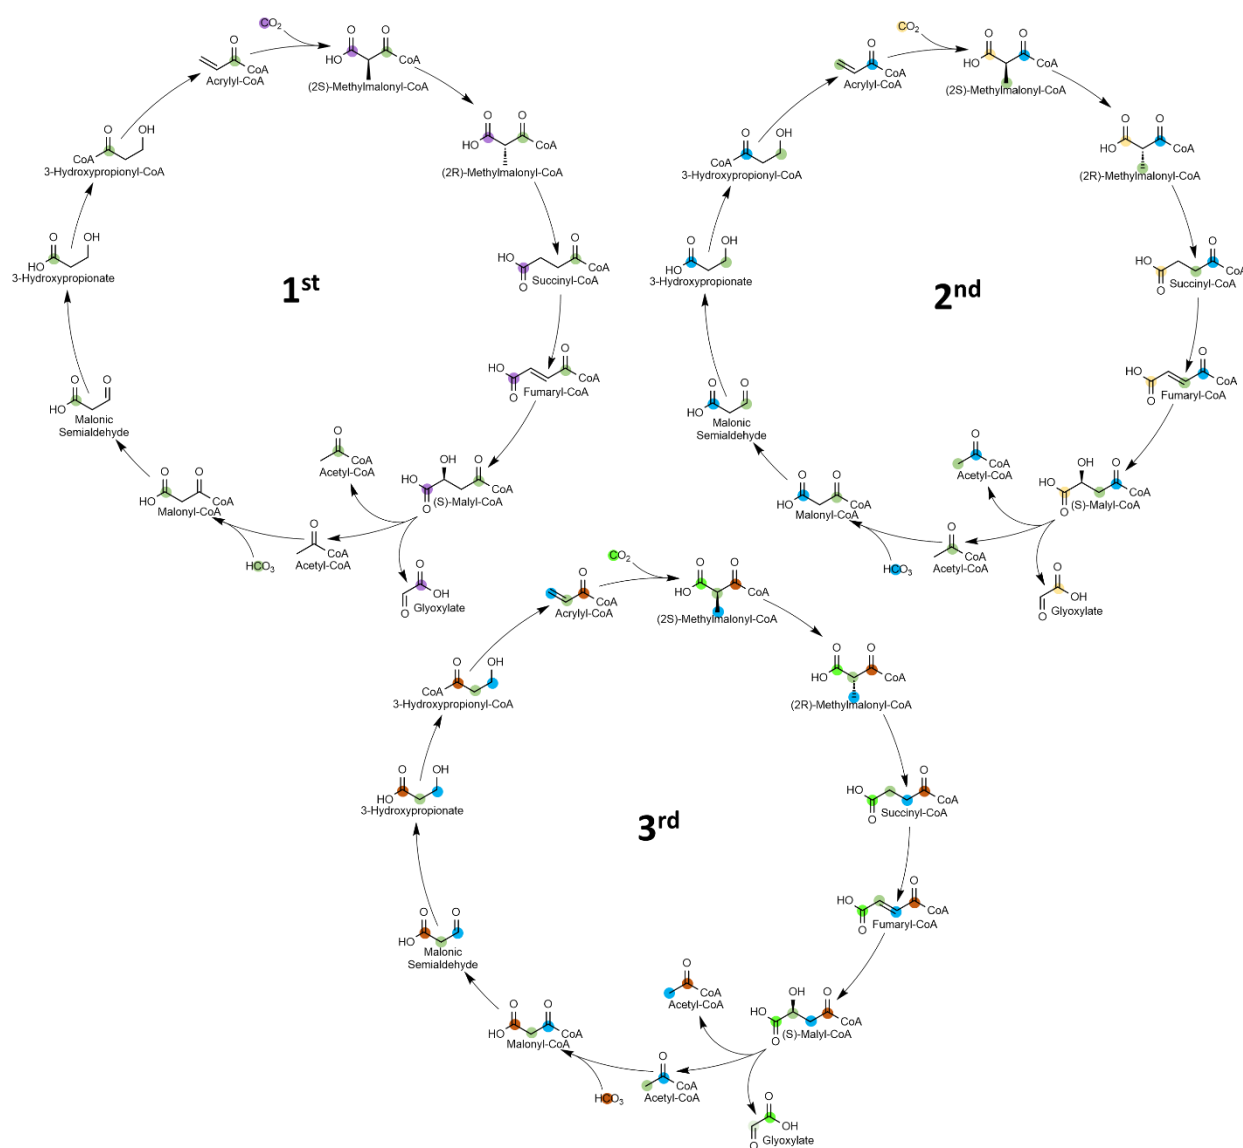

**Supplemental Figure 21.** HOPACPCs/Pcc (non-reductive carboxylation variant). **A.** Construction of the HOPACPCs/Pcc, CoA ligation to 3-hydroxypropionate, 3-hydroxypropionyl-CoA dehydration, and acrylyl-CoA reduction are all performed by the multicatalytic enzyme Pcs. The generation of propionyl-CoA removes the ability to reductively carboxylate with Ccr, so Pcc is added to complete carboxylation in an ATP-dependent manner resulting in an additional net cost of 1 ATP per cycle. **B.** Flux through the cycle over 90 minutes, values given are ion counts derived by LCMS. **C.** Fractional labelling of intermediates, colors correspond to (A.), rationale for labelling can be found in Fig. S20. Legend numbers are normalized to cycle completion, 0 is prior to completing a cycle, +1 is after successful completion of a cycle, +2 is after two.

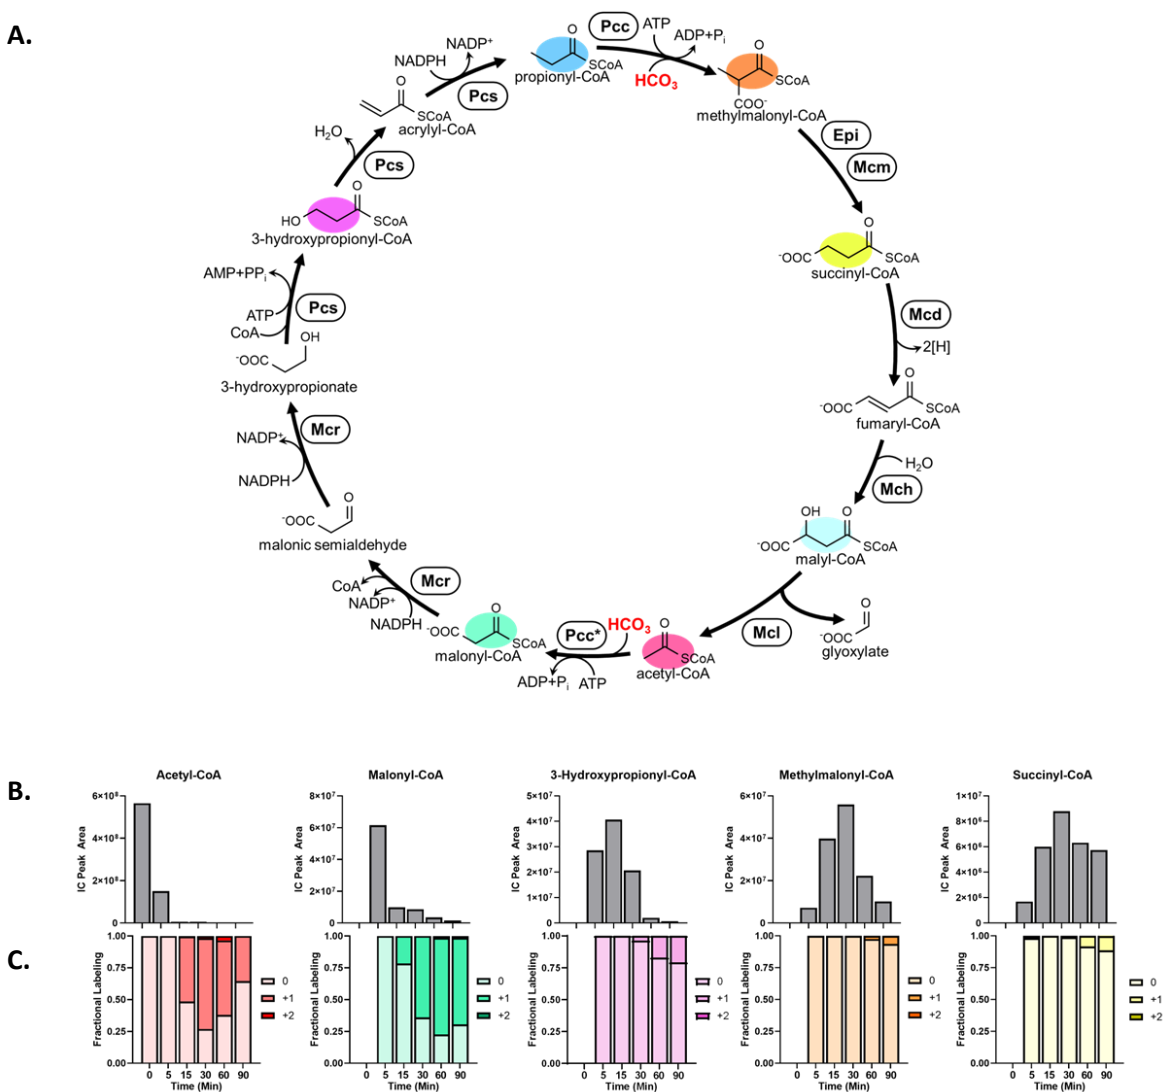



**Supplemental Figure 22.** HOPACCcr 1.0 (reductive carboxylation variant). **A.** Construction of the HOPACCcr 1.0, CoA ligation to 3-hydroxypropionate is performed by Pcl and 3-hydroxypropionyl-CoA dehydration is performed by Ech allowing for the reductive carboxylation of acrylyl-CoA by Ccr. Bypassing the ATP-dependent carboxylation of propionyl-CoA resulting in a net savings of 1 ATP per cycle. **B.** Flux through the cycle over 90 minutes, values given are ion counts derived by LCMS. **C.** Fractional labelling of intermediates, colors correspond to (A.), rationale for labelling can be found in Fig. S20. Legend numbers are normalized to cycle completion, 0 is prior to completing a cycle, +1 is after successful completion of a cycle, +2 is after two.

**A.**

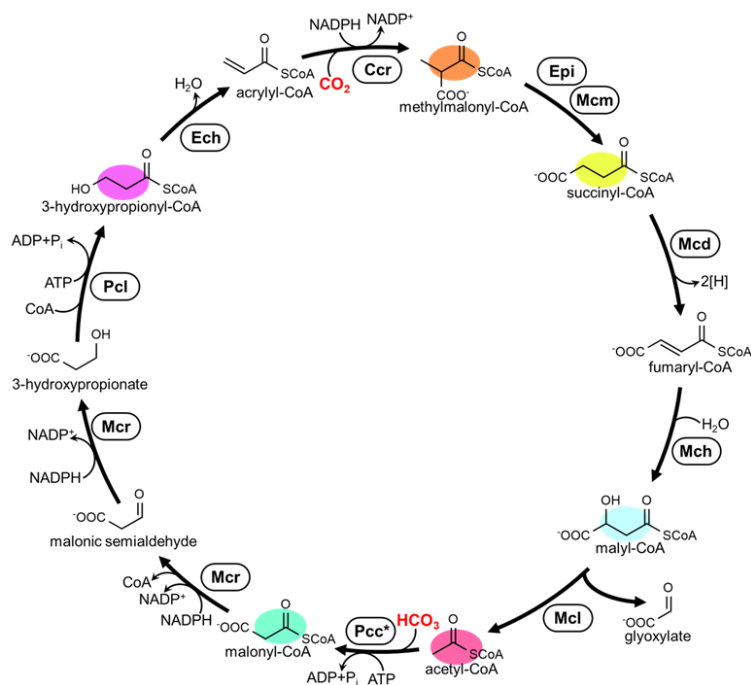

**B.**

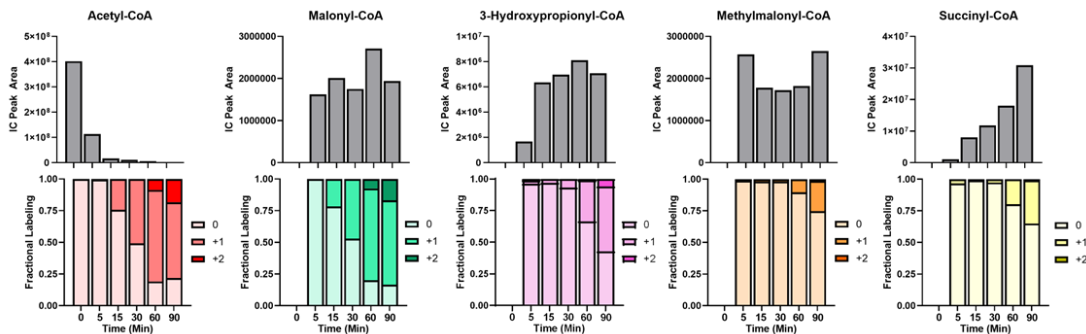

**C.**

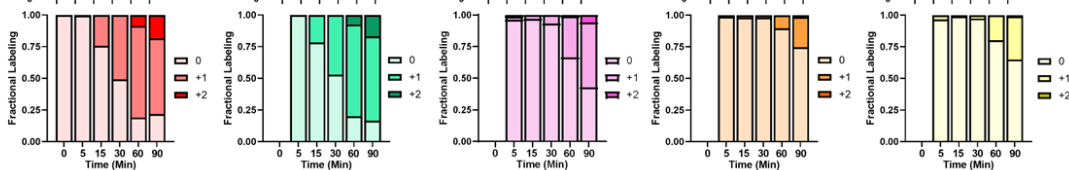

**Supplemental Figure 23.** HOPACCcr 2.0 (addition of the electron carriers). **A.** Construction of the HOPACCcr 2.0, the minimal oxidase activity of Mcd causes a significant bottleneck at succinyl-CoA. The addition of Etf, and solubilized EtfQO which can utilize O<sub>2</sub> as an electron acceptor allow for the relief of this bottleneck. **B.** Flux through the cycle over 90 minutes, values given are ion counts derived by LCMS. **C.** Fractional labelling of intermediates, colors correspond to (A.), rationale for labelling can be found in Fig. S20. Legend numbers are normalized to cycle completion, 0 is prior to completing a cycle, +1 is after successful completion of a cycle, +2 is after two.

**A.**

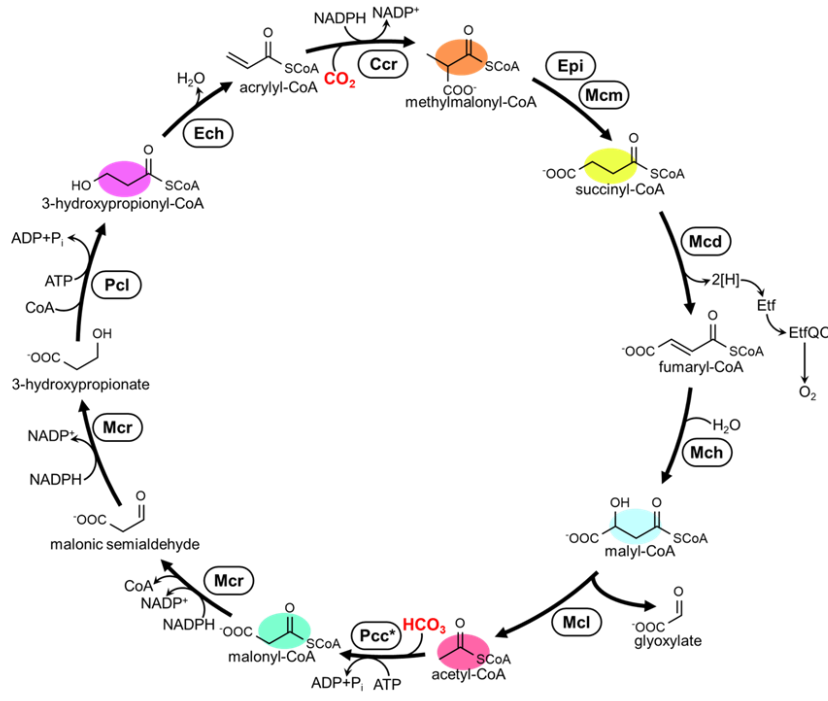

**B.**

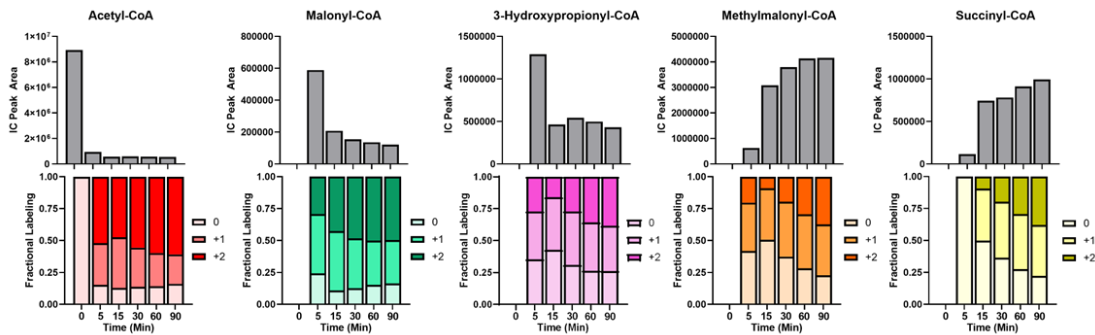

**Supplemental Figure 24.** HOPACCcr 3.1 (Mcm recovery). **A.** Construction of the HOPACCcr 3.0, Mcm suicide inactivation causes a significant bottleneck at methylmalonyl-CoA. The addition of the native Mcm chaperone MeaB extends the life of the enzyme and modestly improves cycling, however the periodic supplementation of fresh Mcm allows for the relief of this bottleneck. **B.** Flux through the cycle over 90 minutes, values given are ion counts derived by LCMS. **C.** Fractional labelling of intermediates, colors correspond to (A.), rationale for labelling can be found in Fig. S20. Legend numbers are normalized to cycle completion, 0 is prior to completing a cycle, +1 is after successful completion of a cycle, +2 is after two.

**A.**

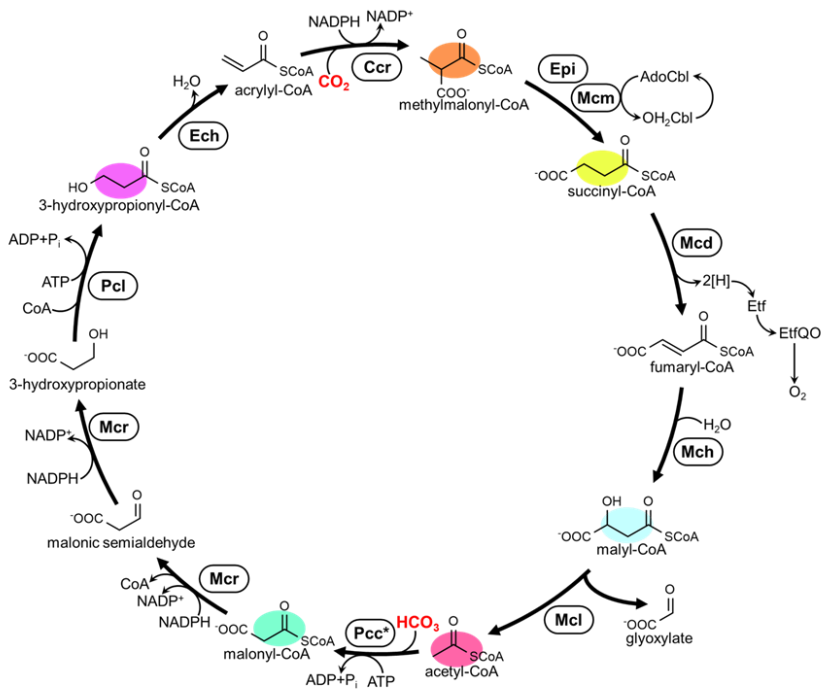

**A.**

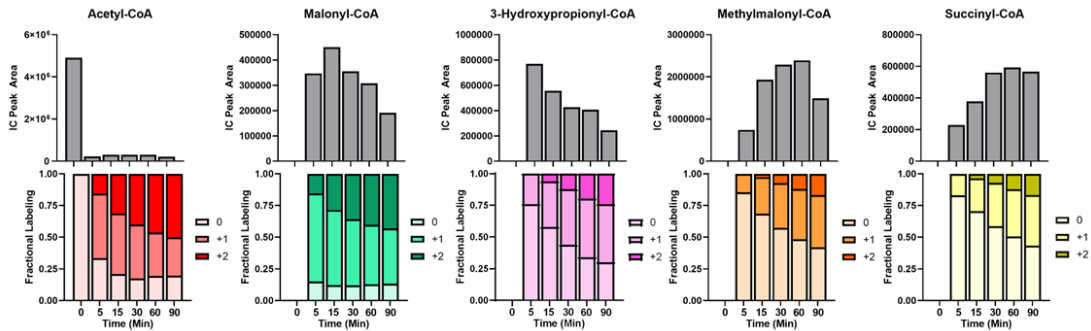

**Supplemental Figure 25. Simulated annealing omit-maps for bound ligands in PmMcd (PDB: 8CIW).** Depicted are Fo-Fc electron density maps at a  $\sigma$  of 2.5 for FAD (yellow) and (2S)-methylsuccinyl-CoA (purple).

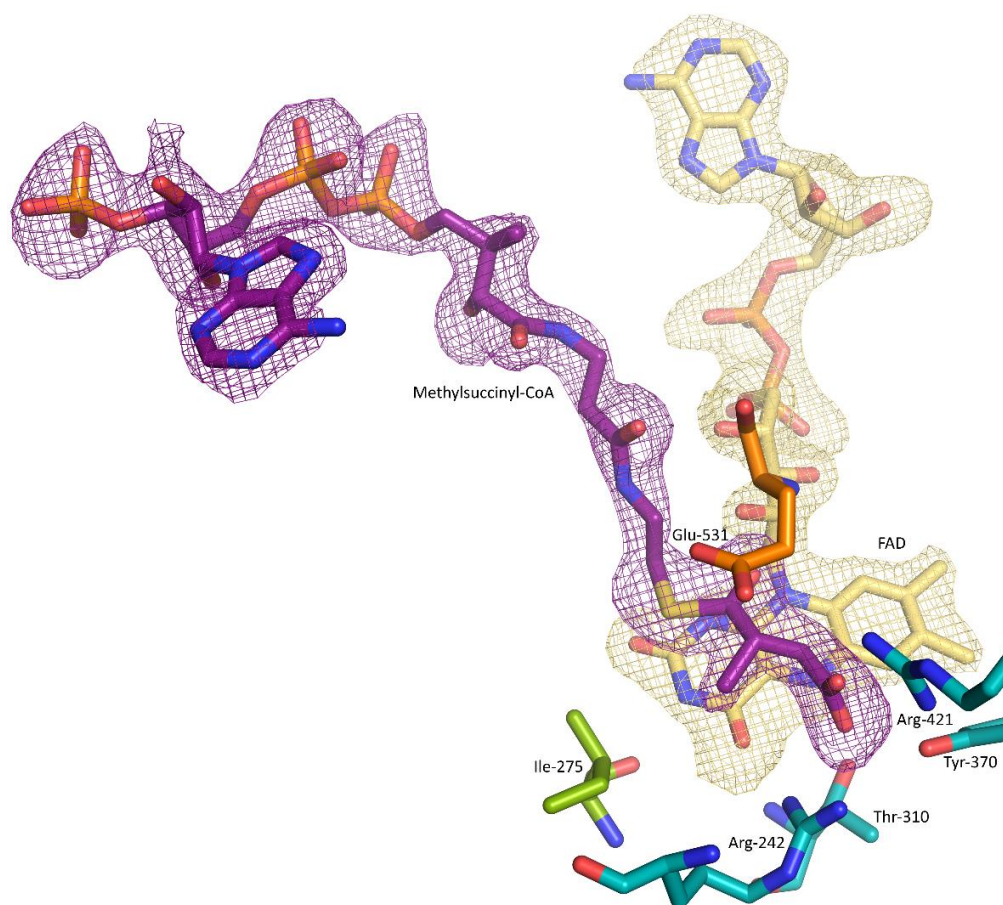

**Supplemental Figure 26. Mutant Mcd activities on methylsuccinyl-CoA (red) and succinyl-CoA (green).**

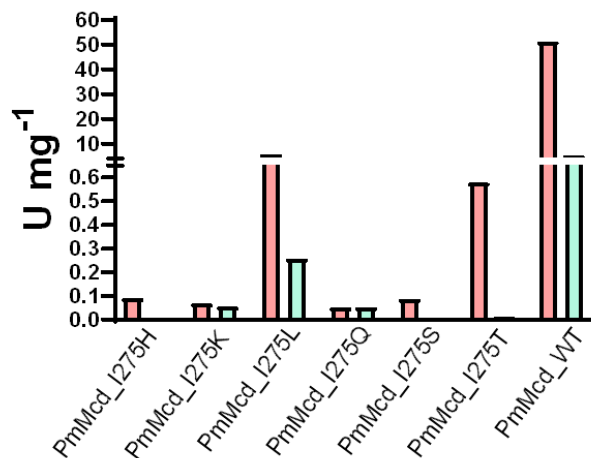

**Data S1:** HOPAC METIS Optimization Setup.

# Amino Acid Sequences

## *Methylorubrum extorquens* Ccr

MAASAAPAWTGGTAEAKDLYELGEI PPLGHVPAKMYAWAIRRERHGPPEQSHQLEVLVPEWIGDDEVLVYVMAAGVNYNGVWAGLGEPI SPFDVHKG  
EYHIAGSDASGI VVKVGAQVKKVWVGDDEVIVHCNQDDGDEECNGGDMFSPSTQRIWGYETGDGSFAQFCRVQSRQLMARPKHLTWEEAACYTTLTA  
TAYRMLFGHAPHPTVRPGQNVLIWAGSGLGVGVQLCAASGANAI AVI SDESKRDYVMSLGAKGVINRKDFDCWQGLPTVNSPEYNTWLKEARKFKG  
AIWDITGKGNVDIVFEHPGEATFPVSTLVAKRGMIVFCAGTTGFNITFDARYVWVRQKRI QGSHFAHLKQASAAQFVMDRRVDP CMSEVFPWDK  
IPAAHTKMWNQHPPGNMAVLVNSTRAGLRTVEDVIEAGLPKAMKLAALAEHHHHHHH-

## *Cereibacter sphaeroides* Epi

MGHHHHHHHHSSGHIEGRHMI GRNLNHVAIAVPDLEAAAAQYRNTLGAEVGAPQDEPDHGVTVIFITLPTNKIELLHPLGEGSPIAGFLEKNPAGG  
IHHCIEVEDILAARDRLKEAGARVLGSGEPKI GAHGKPVFLFHPKDFNGCLVELEQV-

## *Cereibacter sphaeroides* Mcm

MGHHHHHHHHSSGHIEGRHMLLEDPMTELDLAWRKLAEKELKKGKSPDSL TWNTLEGI PVKPLYTRADLAGMEHL DGLPGVAPFTRGRVATMYAGR  
WTRIQYAGFSTAEASNAFYRKALAAAGQQGVSVAFDLATHRGYDSDHPRVVDVGVKAGVAIDSI EDMKILFNGLI PLEKISVSMTMNGAVIPI LANFIV  
TGEEQGVPRAAALSGTIQNDILKEFMVRNTYIY PPEPSMRI IADII EYTSKEMPKFNSI S ISGYHMQEAGANLVQELAYTLADGREYVRAALARGMNV  
DDFAGRLSFFFAIGMNFMEAAKLRAARLLWHRIMSEFAPKKPGSLMLRTHCQTSVGLQEQDPYNNVIRTAYEAMS AALGGTQSLHTNALDEAIAL  
PTEFSARIARNTQIILQEETGVTRVVDPLAGSYVVESLTAELAEKAWALIEEVEAMGGMTKAVASGMPKLRIEESAARRQAAIDRGEDVIVGVNKYR  
LAKEDPIEILDIDNVAVRDAQIARLEKMRATRDEAACQAALDELTRRAEAGGNLLEAAVDASRARASVGEISMAMEKVFGRHRAEVKTL SGVYGAAY  
EGDDGFAQIQRDVESFAEEEGRRFRMLVVKMGQDGHDRGAKVIATAFADIGFDVVDVGTLFQTPEEAAQDAIDNDVHVVGISSLAAGHKTLPAPLIEA  
LKEKGAGEILVICGGVIPPQDYDFLQQAGVKAI FGPPTNIPSAAKHILDLIREARS-

## *Cereibacter sphaeroides* MeaB

MDLTDLASRLASGDRRALARAITLVESRRADHREAA LALLADLARNGREALRIGLSGTPGVGKSTFIESFGLRLTGQGLKVAVLAVDPSSARS SGGSI  
LGDKTRMERLSRDPQAFIRPSPSQTHLGGVARRTREAVALCEAAGFDVILIEYTVGVGQSETVVAQLCDLFLLLAPAGGDELQGVKRGIMEMADLIL  
VNKADGDLKPAALRTVADYAGALRLLRRRPQDPEDFPKAMPVSALEE QGLADAWTEMQALVAVRRETGHFARRRAEQARHWFEVEVREGLLAVLSRP  
GPARERMARLGAAVTRGEITPEAAAAELLTLLAAALEHHHHHHH-

## *Pseudomonas migulae* Mcd

MGSSHHHHHHSSGLVPRGSHMLPITAADDVQGLLLQLRGLLEQAI SALASRCTKGRQLDAELLDLMQVPTFELAWASAE LLAERSLQAIDAGTSSV  
DRRLILVFAVEAITLVHRSLEATYAE LLDLADGTLHAI AADQKLRALRRSVLSSTALHDSARLMVERPEQIGQVAMGDELSMIEDQFRFAADTVAPL  
AEHIHREDLIIPDLSLAAALRDMGVFGLSIPERYGGSAPDDQEDPLTMIVVTEALSQASLAAAGSLITRPEILSRALLSGGTESQKQHWLARLAVGDP  
LCAIAITPEPDYGSVDVAGLTLRGTPECGWRNLNGAKTWCCTFAGKAGVLMVVTRTNPDKSLGHRGLSLLAEKPSYDGHDFDFRPGGGSLTGRAIPTI  
GYRGMHSFDLSFEDFFVDPGNVIGEAQGLGKGFYHTMAGMTGGRMQTAGRASGVMRAALLAGLRYATERKVFSGPLLDYPLTGAKLTKMAARYVASR  
YLTYSVGRMLAQGEGRMEASLVKLFACRSAE LVTRESLQIHGGMGYAEVAVSRYFVDARVLSIFEGAEETLALKVIGRSLLEAALKAEAA-

## *Pseudomonas migulae* Etf

MGSSHHHHHHSSQDPETILVIAEHDNKVLAPATLNTVAAAAKIGGDIHVLVAGQGAGAVAEAAA K IAGVAKVLVADNAAAYAHQLPENVA PLVAELGKG  
YSHILAAATSNNGNIPRVAQAQLDQVDSI EII SVESADTFKRP IYAGNAIATVQSNASVKVITVTRATGFDPAEAGGSAAVEAVAAAHNAGTSS FVG  
EELAKSDRPELTAAKIVVSGRGMQNGDNFKHLYALADKLGAAV GASRAAVDAGFVNDMQVQGTGKIVAPQLYI AVGISGAIQHLAGMKDKSVIVA  
INKDEEAPIFQVADYGLVADLFEAIP EFEKLV-

MKVLVAVKRVVDYVNVKRVKADNSGVDLANVKMSMNPFCIEIAVEEAVRLKEKGVATEIVVVS VGPSTAQEQLRTALALGADRAI LIVESAEDLTS LAV  
AKLLKAVVDKEQPQLVILGKQAI DSDNNQTGQMLAALSGYQGT FASKVEVSGDSVAVTREIDGGAQTVSLKLP AIVTDTLRLNEPRYASLPNIMKA  
KKKPLEVLTDPDALGVSTASTNKTVKVEAPAARSAGIKVKSVAE LVEKLNKAEKVI-

## *Pseudomonas migulae* EtfQO

MGSSHHHHHHSSGLVPRGSHMEREYMEFDVVIVGAGPAGLSAACRLKQKAAEAGKEISVCVVEKGEVGAHILSGAVFEPRALNELFPDWKELGAPL  
NTPVTRDDIFVLKNADSAQKIPDLFVPKTMHNEGNYIISLGNLCRWLAQQAENLVEIYPGFAAQEALFDENGVVIRGITGDLGVDREGHGPKGLY  
PGMELRGKYTLFAEGCRGHIGKQLIKRFLNDSEADAQHYGIGLKEIWEIDPAKHQPGLVVHTAGWPLDIMGTENTGGSFLYHLENNQVVVGLIVDLS  
YSNTYLSFPDEFQRLKHPVQLKQYLEGGKRISYGARAI CKGGLNSLPKMVFKGGALIGCDLGTLNFAKIKGSHTAMKSGMLAAESVAEALFAEKDGT  
EELTTYVDAFKKSWLYDELFA SNFGPAIHKFGAIVGGFNWLDQNI FGGKLPFTLHDTKPDYACLKLAADCKKIDYKPKDGI SFDKLSSVFI SGT  
NHEEEQPCHLKLTDPSIPIAKNLPMYDEPAQRYPAGVYEVVTKEDGEKRFQINAQNCVHCKTCDIKDPAQNI TWVAPEGAGGPTYPNM-

## *Cereibacter sphaeroides* Mch

MGHHHHHHHHSSGHIEGRHMKTNAGRFFEDYRLGETIAHAVPRTVSGGERALYHALYPARHALSSSDEFARACGLPAAPVDELMAFHVFGKTV  
DISLNAVANLGYAEGRWLKPVPFGDTLRAESTVIGLKENSNGASGVVWVTRGLNQGEAVLSYVRWVMVRKRDTAAPAPAPTVP ELAGSVAASDLV  
IPEGLSFTDYDLTLAGEPHRWGDYAVGEKIDHVDGVTVEESEHMLATRLWQNTAKVHF DATNRPDGRRLIYGGHVISLARTLSFNGLANAQMI VALN  
AGAHPNCFAGDTRAWSEVLDAETADPGV GALLRLRLVAMKHGTEPFVTRSEDGKYLPGVLLDLDY WALVPR-

## *Cereibacter sphaeroides* Mcl

MGHHHHHHHHSSGHIEGRHMSFRLQPAPPARNRCQLFGPGRSPALFEKMAASAADV INLDLEDVAPDDKAQARANI IEAINGLDWGRKYL SVR  
INGLDTPFYRVDVLDLLEQAGDRLDQIMI PKVGAADYAVDALVTAIERAKGRTKPLSFEVI IESAAGIAHVVEEIAASSPRLQAMSLGAADFAASM  
GMQTTGIGGTQENYMLHDGQKHWSDPWHWAQAAI VAACRTHGILPVDGPFDFSDDEGFRAQARRSATLGMVGKWA IHPKQVALANEVFTPSETAV  
TEAREILAAMDAAKARGEATVYKGRVLDIASIKQAEVIVRQAEMISA-

*Methylobacterium extorquens* Pcc (D407I)

MGSSHHHHHHSSGLVPRGSHMKDILEKLEERRAQRARLGGGKRLAEQHKRGLTARERIEELLDDHGSFEEFDMFVQHRSTDFGMEKQKIPGDGVVTVG  
WGTVNGRTVFLFSKDFTVFGGSLSEAHAAKIVKQDMALKMRAPIIGIFDAGGARIQEGVAALGGYGEVFRNRVAASGVIPOISVIMGFCAGGDVYS  
PAMTDFIFMVRDTSYMFVTPGDPVVKTVTNEVVTAEELGGAKVHTSKSSADGFSFENDVEAILQIRRLDLDLFPANNIEGVPEIESFDDVNRDLKSLDT  
LIPDNPNKPYDMGELIRRVDDEGDFEIQAAAYARNIITGFGRVVEGRTVGFVANQPLVLAVGLDSDASRKAARFVRFNCAFSIPVTFVDVPGFLPGT  
AQEYGGLIKHGAKLLFAYSQATVPLVTIITRKAFFGGAYIVMASKHVAGADLNVAWPTAQIAVMGAKGAVEIIFRAEIGDADKIAERTKEYEDRFLSPF  
VAERGIYIDEVIMPHSTRKRIARALGMLRTKEMEQPWKKHNDIPL-

MFDKILIANRGEIACRIIKTAQKMGIKTVAVYSADADRDAVHVAMADEAVHIGPAPAAQSYLLIEKIIDACKQTGAQAVHPGYGFLSERESFPKALAE  
AGIVFIGPNPGAIAAMGDKIESKAAAAAEVSTVPGFLGVIESPEHAVTIADIEIGYPMIKASAGGGGKGMRIAESADEVAEGFARAKSEASSFGD  
DRVFVEKFITDPRHIEIQVIGDKHGNVYILGERECSIQRRNQVIEEAPSPLLEETRRKMGQAVLAKAVNYDSAGTVEFVAGQDKSFFYLEMNT  
RLQVEHPVTEMITGLDLVELMIRVAAGEKPLSQDQVKLDGWAVESRYAEDPTRNFPSIGRLTTYQPPEEGPLGGAIVRNDTGVEEGGEIAIHVD  
PMIAKLVWAPTRLEAIEAQATALDAFAIEGIRHNIPLATLMAHPRWRDGRLLSTGFIKEEPEGFIAPEPEGPAVHRLAAVAAAIDHKLNIRKRG  
SGQMRDPSLLTFQRERVVLSGQRFNVTVDPDGDDLVTDFDDGTAPVRSARWPGAPVWMSGTVGDQSVAIQVRLNNGVFLQHAGAAAARVFTRE  
AELADLMPVKENAGSGKQLLCPMPGLVKQIMVSEGEVKNGEPLAIVEAMKMNVLRAERDGTISKIAAKEGDSLAVDAVILEFA-

*Chloroflexus aurantiacus* Mcr

MGSSHHHHHHSSGLVPRGSHMSSGTGRLAGKIALITGGAGNIGSELTRRFLAEGATVVISGRNRAKLTALAERMQAEAGVSAKRIDLEVMDGSDPV  
AVRAGIEAIVARHGQIDILVNNAAGSAGAQRRLAEIPLTEAELGPGAETLHASIANLLGMGWHLMRIAAPHMPVGSVINVESTIFSRAEYYGRIPYV  
TPKAALNALSQLAARELGARGIRVNTIFPGPIESDRIRTVFQRMQDLKGRPEGDTAHHFLNTRMLCRANDQGALERRFPVSGVDVADAFLASAESA  
ALTGETIEVTHGMELPACSETSLARTDLRTIDASGRITLICAGDQIEEVMALTMGLRTCGSEVIIGFRSAAALAQFEQAVNESRRLAGADFTPIA  
LPLDPRDPATIDAVFDWAGENTGGIHAAVILPATSHEPAPCVIEVDDERVNLFADDETGTIVIASRLARYWQSRLTPGARARGPRVIFLNSGADQ  
NGNVYGRIQSAAIGQLIRVWRHEAELDYQRASAAGDHVLPVWANQIVRFANRSLEGLFACAWTAQLLHSQRHINEITLNI PANISATTGARSASV  
GWAESLIGLHLGKVALITGGSAGIGGQIGRLLALS GARVMLAARDRHKLEQMAMIQSELAEVGYTDEDVRVHIAPGCDVSSEALADLVERTLSAF  
GTYDYLINNAGIAGVEEMVIDMPVEGWHRHTLFLANLISNYSLMRKLAPLMKKQGSYILNVSYYFGGEKDAAIYPYPRADYAVSKAGQRAMAEVFAF  
LGPEIQINAIAPGPVEGDRLRGTGERPGLFARRARLILENKRLELHAALIAAARTDERSMHLELVELLPPNDVAAEQNPAAPTALRELARRRSEG  
DPAASSSALLNRSIAAKLLARLHNGGYVLPADIFANLPNPPDFFTTRAQIDREARKVRDGMGLYLRMPTEFDVAMATVYLLADRNVSGETTFHP  
SGGLRYERTPTGGELFLGLPSPERLAEVGVSTVYLI GEHLTHELNLLARAYLERYGARQVVMIVETETGAETMRRLLHDHVEAGRLMTIVAGDQIEAA  
IDQAITRYGRPGPVVCTPFRPLPTVPLVGRKSDSWSTVLSAEFAELCEHQLTHHFRVARKIALSDGASLALVTPETTATSTTEQFALANFIKTTLLH  
AFTATIGVESERTAQRILINQVDLTRRARAEEPRDPHERQOQELERFIEAVLLVTAPLPEADTRYAGRIHRGRAITV-

*Cupriavidus necator* Pcl

MGSSHHHHHHSSGLVPRGSHMTADAEEETDMTASHAVHARSLADPEGFWAEQAARIDWETPFGQVLDNSRAPFTRWVFGGRTNLCHNAVDRHLAARAS  
QPALHWVSTETDQARTFYAELHDEVSMAAILQGLDVKQKDRVLIYMPMIEAFAFLACARIGAIHSSVVFGGFASVSLAARIEDARPRVVVSADA  
GSRAGKVVFPYKPLLDEAIRLSSHQPGKVLVLDVRLQAQMPREGRDEYAAWRERVAGVQVPCVWLESSEPSYVLYTSGTTGKPKGVQRDTGGYVAL  
ATSMYIFPCGKPGDTMTASDITGWVGHSYIVYGPLLAGMATLMYEGTPIRPDGGILWRLVEQYKVNLMFSAPTAIRVLKQDPAWLTRYDLSSLRL  
LFLAGEPLDEPTARWIQDGLGKPVVDNYWQTESGWPI LAIQRGIEALPPLKSGVPGVAYGYDLKIVDENTGAECPPGQKGVVAIDGPLPPGCMSTVW  
GDDDRFVRTYQWAVPNRLCYSTFDWGVADADGYVFI LGRTDDVINVAGHRLGTREIEESLSSNAVAEVAVVGVQDALKGQVAMAFCIARDPARTAT  
AEARLALGELMKTVEQQLGAVARPARVFFVNALPKTRSGKLLRRAMQAVAEGRDPGLTTTIEDPGALEQLQAALKG-

*Pseudomonas aeruginosa* Ech

MGSSHHHHHHSSGLVPRGSHMSQVQNI PYAELEVQKAEYTSIAERDLQLFAAVSGDRNPVHLDAAYAAATTFKERIAHGMLSGALISAAIATVLP  
PGPTIYLGQTLRFRTRPVKLGDDLKVELEVLEKLPKNRVRMATRVFNQAGKQVVDGEAEIMAPEEKLSVELAELPPISIG-

*Gluconobacter oxydans* Grd

MGSSHHHHHHSSGLVPRGSHMSSPKIGFIFYGAMAQRMGANLRKAGYPVVAYAPSGGKDETEMLPSPRAIAEAAEIIIFCVPNDAENESLHGENGA  
LAALTPGKLVLDSTVSPDQADAFASLAVEHGFSLLDAPMSGSTPEAETGDLVMLVGGDEAVVKRAQPVLDVIGKLTIHAGPAGSAAARKLVVNGVM  
GATLNVAIEGVSYGAAAGLDRDVFDTLQQVAVVSPHHRKRLKMGQNRFPSPFPTRLMKMDMGLLLDAGRKVGA FMPGMAVADQALALSNRLHANE  
DYSALIGAMEHSVANLPHNSSTTTTTTEIRLLTKPERKLSWLLPPLSNN-

*Escherichia coli* Scs

MGSSHHHHHHSQDLNLHEYQAKQLFARYGLPAPVGYACTTPREAEAAASKIGAGPVVVKCQVHAGGRGKAGGVKVVNSKEDIRAFENWLGKRLVTV  
QTDANGQPVNQILVEAATDI AKELYLGAVVDRSSRRVFMASTEGGVEIEKVAEETPHLIHKVALDPLTGMPYQGRELAFKLGLEGLKLVQQFTKIF  
MGLATIFLBRDLALIEINPLVITKQGDLCIDGKLGADGNALFRQPDLEMRDQSQEDPREAQAAQWELNYVALDGNIGCMVNGAGLAMGTMDIVKL  
HGGE PANFLDVGGGATKERVTEAFKII LSDDKVAVLVNI FGGIVRCDLIADGII GAVAEVGVNVPVVRLEGNNAELGAKKLADSGLNI IAAKGLT  
DAAQQVVAAVEGK-

MSILIDKNTKVICQGFTSQGTFFHSEQAIAYGTKMVGVTGPKGGTTHLGLPVFNTVREAVAATGATASVIYVPAPFCDSILEAIDAGIKLITIT  
EGIPTLDMLTVKVKLDEAGVRMIGPNCVITPGECKIGIQPHIHKPKGVIVSRSGTLTYEAVKQTTDYGFQGSTCVGIGGDIPIGNSFIDILEM  
FEKDPQTEAIVMIGEIGSSAEAEAAAYIKEHVTKPVVGYIAGVTAPKQKRMGHAGAI IAGKGTAEDEKFAALEAAGVKTVRSLADIGEALKTVLK-

*Chloroflexus aurantiacus* Smt

MGSSHHHHHHSQDPPPTGEEPSGHAESKPPASDPMSTPGTGQEQPLPSGIRVIDVGNFLAGPYAASILGEFGAEVLKIEHPLGGDPMRRFGTATARH  
DATLAWLSEARNRKSVTIDLRQQEGVALFLKLVAKSDIL IENFRPGTMEEWGLSWPVLQATNPGLIMLRVSGYQGTGPYRRRS GF AIIAHAFSGLSY  
LAGFPGETPVLPGTAPLDYIASLFGAIGILIALRHKEQTGRGQLIDVGIYEA VFRILDEIAPAYGLFGKIREREGAGSFIAPVPHGHFRSKDGKWA

IACITDKMFERLAEAMERPELASPELYGDQRKRLAARDIVNQITIEWVGLTRDEVMRRCLEKEVVPVGPLNSIADMFNDEHFLARGNFACIEAEBGIG  
EVVVPNVIPRLSETPGRVNLTGPPPLGNATYEVLRLELDDISAEIEIKRLRSKII-

MDGTTTTLPLAGIRVIDAATVIAAPFCATLLGFEFGADVLEKVEHPIGGDALRRFGTPTARGDRTLWLSESRNKRSVTLNLQHPEGARVFKELIAHSDV  
LCENFRPGTLEKWGLGWDVLSKINPRLIMLRVTGYGQGTGYPYRDRPGFARIAHAVGGIAYLAGMPKGTPTVPGSTTLADYMTGLYGCIGVLLALRHRE  
QTGRGQYIDAALYESVFRCSDELVPAYGMYRKRVRERHGSYNEFACPHGHFQTKDGGKVAISCATDKLFARLANAMGRPELASSSVYGDQKVRLAHA  
SDVNEIVRDWCSSLTRAEVLERCYATATPAAPLNADIADFFGDRHVHARRNLVAIDAEDLGETLIMPVVPKLSSETPGSIRSLGPKLGEHTEEVLEKEI  
LGMCDQINDLRSKRVI-

*Mus musculus* Sch

MGSSHHHHHSSGLVPRGSHMAATLSVEPTGRSCWDEPLSIAVRGLAPEQPVTLRSVLRDEKALFRAHARYRADSHGELDLARVPALGGSFSGLEP  
MGLLWAMEPDRPFWRLIKRDVQTPFLVELEVLGDGHEPDGRRRLARTVHERHFMAPGVRVVPVREGRVATLFLPPGQGFPGIIDVYGVGGGLLEYR  
AGLVAGHGFFATLALAFYDFEDLPKELNVEVDYFEEAVRYMLRHPKVKGPDIGLLGLSLGADVCLIMASFLNNVSATVVSINGSAFSGNRHIKYQTM  
IPPLGHDLRRMKVAFSGILDIVDIRNDVAVGCCENPSMIPIEKAKGPILFVAGQDDHCWRSELYTQIASDRLQAHGKERPVLSYPGTGHYIEPPYFP  
MCPASLHKIVNEAVIWGGEVKAHSAQIDAWKQILFFFGKHLGSTHSRASCRL-

*Escherichia coli* Sdh

MGSSHHHHHSSQDPKLPVREFDAVIVIGAGGAGMRAALQISQSGQTCALLSKVFPTRSHTVSAQGGITVALGNTHEDNWEWHMYDTVKGS DYIGDQDA  
I EYMCKTGP EAI LEHMG L PFSRLDDGRIYQRPFGGQSKNFGEQAARTAAAADRTGHALLHTLYQQLNKNHTTIFSEWYALDLVKNQDGA VVGCT  
ALCIETGEVVYFKARATVLTATGGAGRIYQSTTNAHINTGDGVMAIRAGVVPQDMEMWQFHPTGIAGAGVLTVEGCRGEGGYLLNKHGFERFMERYAP  
NAKDLAGRDVVARSIMIEIREGRGCDGPGWPHAKLKL D HLGKEVLESRLPGILELSRTFAHVDPVKEIPVITPCHYMMGGIPTKVTGQALT VNEKG  
EDVVVPLGFAVGEIACSVHGANRLGGSLLDLVVFGRAGLHLQESIAEQGALRDASESDVEASLDRLNRWNNNRNGEDPVAIRKALQECMQHNF S  
VFREGDAMAKGLEQLKVI RERLKNARLDDTSSFEFNTQ RVECELDNLMETAYATAV SANFRTE SRGHSRFD FDRDENWLCHSLYLP ESESMTRR  
SVNMEPKLRPAFPFKIRTY-

MRLEFSIYRNPVDVDDAPRMQDYTLEADEGRDMLLDALIQLEKDKPSLSFRRSREGVCGSDGLNMNGKGLACITPISALNQPGKIVIRPLPGL  
PVIRDLVDMGQFYAQYEKIKPYLLNNGQNPPAREHLQMPQEQRKLDGLYECILCACSTSCPSFWWNPKF IG PAGLLAAYRFLIDSRDTE TDSRL  
DGLSDAFSVFRCHSIMNCVSVCPKGLNPTRAIGHIKSMLLQRNA-

*Escherichia coli* Fuh

MRGSHHHHHTDPALRANTVRSEKDSMGAIDVPADKLGWAQTQRSLEHFRISTEKMPTSLIHALALTKRAAAKVNEDLGLLSEEKASAIRQAADDEVL  
AGQHDDEFPLAIWQTGSGTQSNMNMNEVLANRASELLGGVGRMEREKVPNDVVKNSQSSNDVFP TAMHVAALLALRKLIPQLKTLTQLTNEKSRAF  
ADIVKIGRTHLQDATPLTLGQEISGWVAMLEHNLIKSKQPASRNLGLGGTTVGTGLIPSRRCASRTNRLESIPGARLFSPKILTWDRLAPSRPPSS  
IKWRALKNTQNPGRVSPQLQCCYPPEERYRREQHVAYFSLDEWK-

*Methylobacterium extorquens* Mcs

MDVHEYQAKELLASFGVAVPKGAVAFSPDQAVYAATELGGSFVAVKAQIHAGARGKAGGIKLCRTYNEVRDAARDLLGKRLVTLQTGPEGKPVQRVY  
VETADPFERELYLGVLDRKAERVRVIA SQRGMDIEEIAAKEPEALIQVVVEPAVGLQFQAREIAFQLGLNIKQVSAAVKIMNAYRAFRCDCGT  
MLEINPLVVTKDRVLALDAKMSFDDNALFRRRNIA DMHDP SQGDPREAAEHNLSYIGLEGEIGCIVNGAGLAMATMDMIKHAGGEPANFLDVGG  
GASPDRAVATAFRLVLSDRNVKAILVNI FAGINRCDWVAEGVKAAREVKIDVPLIVRLAGTNVDEGKILAESGLDLITADTLTEAARKAVEACHGA  
KH-

MKARRSSPRAGSTSSPPTPLRKPRLRSLKAPATPSTDERGRNHAMSILIDEKTPILVQGITGDGKTFHAKEMIA YGSNVVGGVTPGKGGKTHCGVPV  
FNTVKEAVEATGATTSITFVAPPFAADAIMEAADAGLKLVCISITDGI PAQDMMRVKRYLRRYPKEKRTMVVGPNCAGIISP GKSM LGIMP GHI YLPG  
KVGVI SRSGTLGYEAAAQMKELGIGISTSVGIGGDPINGSSFLDHLALFEQDPETEAVLMIGEIGGPQEAESA WIKENFSKPVIGFVAGLTAPKGR  
RMGHAGAIISATGDSAAEKAEIMRSYGLTVADPGSFGSTVADVLARAAAAALEHHHHHHH-

*Chloroflexus aurantiacus* Mcr C-Term

MGSSHHHHHSSGLVPRGSHMSSASVWAE SLIGLHLGKVALITGGSAGIGGQIGRLLALSGARVMLAARDRHKLEQMAMIQSELA EVGYTDVEDR  
VHIAPGCDVSSEQLADLVERTLSAFGTVDYLINNAGIAGVEEMVIDMPVEGWRHTLFANLISNYSMLRKLAPLMKKQSGSYILNVSSYFGGEKDA  
IPYPNRADYAVSKAGQRAMAEV FARFLGPEIQINAIAPGPVEGDRLRGTERPGLFARRARLILENKRNLNELHAALIAAARTDERSMHELVELLLPN  
DVAALEQNPAAPTALRELARRFRSEGDPAASSSSALLNRSIAKLLARLHNGGYVLPADIFANLPNPPDPFFTRAQIDREARKVRDGMIMGLYLQRM  
PTEFDVAMATVY LADRNVSGETFHPSGGLRYERTPTGGELEFLPSPERLAELVGVSTVYLIGEHLTEHLNLLARAYLERYGARQVMI VETETGAET  
MRLLHDHVEAGRLMTIVAGDQIEAAIDQAITRYGRGPVVC T PFRPLPTVPLVGRKSDSWTVLSEAEFAELCEHQLTHHFRVARKIALSDGASLA  
LVTPETTATSTTEQFALANFIKTTLHAFATATIGVESERTAQRILINQVDLTRARAEEPRDPHERQQLERLIEAVLLVTAPLPPEADTRYAGRIHR  
GRAITV-

*Rhizobium hidalgonense* βapt

MGSSHHHHHSSGLVPRGSHMDQISKTNAPVLENFWMFPFTANRQFKATPRLLAADGMYYTVDVGNQVLDGTAGLWCCNAGHGRKKIARAVERQLST  
LDYAPTFQMGP IAFDFAAKLAANAPGGTDSKLDRVVFTGSGSESVDTALKIAIAYQRAIGQTRTRIIGREKGYHGVGFGGIVSGGLVNNRRVFPQ  
IPADHMRHTLDVERNAFSGKLP AHGVELADDLERLVQLHGPE TIAAVIVEPMSG SAGVVL PPKGYLEKLRATADKHGILLIFDEVITGFGR LGTPFA  
VDYFGVVPDLVTTAKGLTNGAIPMGAVFASRKVYDGLMVG PENAIELFHGYTYS GHPVACAAGLATLEIYEEEGLLTRAAELAEYWQEGLSHLKGLP  
HVVDIRNLGLVGAIELAPRAAGTRAYDIFVDCFNKGLLIRVTGDI IALSPPLIEK SQIDTIVSTIGDALKRAA-

*Cereibacter sphaeroides* Adh



MGSSHHHHHHSSGLVPRGSHMRIGCPKEIKPQEFVRVGLTPHAAREAAASHRHEVLVEAGAGAGAGSDEEDYRAAGARLVDTAEELFAAAELIVKVKEP  
QVVERQRLREGQLLFTYHLHAPDPEQTRDLMASGVTAIAYETVTDTRGGLPLLAPMSEVAGRLAPQVGAWTLQKANGRGVLLGGVPGVGPAAKVVVI  
GGGVVGTAAARIAAGMGADVTVLDRSLPRLRALDEAFGLFRFTSYASSGTTAEVLVTAADLVIGAVLIPGAAAPKLVSAQLGTMKPGAAIVDVAIDQ  
GGCFETSRPTTHQDPIYEVGDVMHYCVANMPGAVARTSTLALGNATMPFLALADKGWKRACEEDPHLLAGLNTHAGHLTYAVGRALEIDVLSPQL  
ALKM-

*Escherichia coli* GabT

MRGSHHHHHHTDPALRANSNKELMQRRSQAI PRGVGQIHP I FADRAENCRVWDVEGREYLDFAAGI AVLNTGHLHPKVVA AVEAQLKLSHTCFQVL  
AYEPYLELCEIMNQKVPDFAKKTLLVTGSEAVENAVKIARAATKRSGTIAFSGAYHGRTHYTLALTGKVNYPYSAGMGLMPGHVYRALYPCPLHGI  
SEDDAIAS IHRIFKNDAAPEIDAAIVIEFPVQEGGGFYASSPAFMQRLRALCDEHGIMLI ADEVQSGAGRTGLTFAMEGMVAPDLTTFAKSIAGGFP  
LAGVTRAEVMDAVAPGGLGGTYAGNP IACVAALEVLKVFEQENLLQKANDLGQKLDGLLAI AEKHP EIGDVRGLGAMIA IELFEDGDHNPDAKL  
TAEIVARARDKGLILLSCGPYYNVLRI LVLPLTIEDAQIRQGLEIISQCFDEAKQGLCGR-

*Paracoccus denitrificans* Gdh

MGSSHHHHHHSSGLVPRGSHMPQIDDKLAPIYEEVVRNAGEPEFHQAVREVLES LGRVVAKRPDYLEDALIERICEPERQI IFRVPTDDKGRVQI  
NRGFRVQFSSAMGPYKGLRFHPSVNVGIIKFLGFEQIFKNAL TGLPIGGGKGGSDDFPKGRSDGEIMRFCQSFMT ELYRHLGEYTDVPAGDIGVGA  
REIGYMFQYKRLTNRYEAGVLTGKGLFYGGSLARKEATGYGNTYFTQAMLKTGGTDFDGKTVVVS GSGNVAIYTI EKQVEFGGKVIACSDSSGYIV  
DEAGIDLALVKEIKEVRRGRISQYVRMKGEGNGAYFVKS GEGSIWDVACEVAMP SATQNELTKDAAKLVKNGVTAVGEGANMPTPEAIRAFQQAQ  
VKFGPGKAANAGGVATSALEMQNASRDRWSFEKTEAKLAEIMRDIHDS CYSTAE EFGAPGDYVIGANIAGFIRVAEPMRAFVI-

*Stigmatella aurantiaca* βCal

MGSSHHHHHHSSGLVPRGSHMSTKAIIRLRMSSHDAHYGGNLVDGARM LGLFGDVATELCIRHDGDEGLFRAYDSVEFLAPVYAGDFIEAEGEILSE  
GNTSRKMRFEARKVIRPRTDVND SAADLLSEPVVVCRA TGTCTVVPKDKQRI PR-

*Erythrobacter* NAP1 Pcs

MGHHHHHHHHSSGHI EGRHMI GEGDDIGSSNLEKQSHGLRISDRDH FQRLREECRSDPGEFHGR LAKREICW LIEGPGGNPAWAFYDDAETWT  
GWDASSAAPTITLDPESFEPWERAFNDDPPNWRWFEGGLTSTAFNEVDRHVLVSGHGDEAAMI FEGDRWNMASEGGRGGPV DSEVISRKLLLES AK  
CALALKALGLEAGDRIALNMP SIPEQIYWTEGAKRMGI VYTPVFGGFSDKT LSDRIADAGARVVV TADGSYRNAQMV PFKPSYTD PALDNFIAVPVA  
MELLGQAL EDGELVVAP EHA GLIRSEVAGLLDGEVTVERSDVMRGV GKALTA IASGEAAGGAMTPRQA AQLRIAIASALVDS PPRVDAVVVVKHTAQ  
PDLFWNEARDHWSHDLTAAAGEELLKAARDAGFDVADEEALLALS DTEFVRAIWAGAPVLAVDAEY PNFIIYTS GSTGKPKGVVHVHGGYASGVAAT  
MPAAFGAEPGDVMYVVD PGIWITGQSYQIAASLLSRVTTVIT EGSVPVPHAGRFASI IERYGVNVFKAGVTF LKSVMQNPENLKD IQR YDLSL KVA  
TFCAEPVSPAVQAFAMEHITHRYINSY WATEHGGMVVTHFADADGFPLEADAHTYPLPWIMGDVWVEDADGSSNGPVEYERDTGTGGAPWRVAEDGE  
KGEIVIALPYPYLTRTIWGDVENFTVEHVGNLARVAGGWRGDEVRYADTYWRRWKGAWAYTQGD FAMRHPDGSFSLHGRSDDV INVSGHRIGTEIE  
GAILRDKALD PNPVGNVIVIGAPHSQKGVTP IAFVTPVEGRRLTQDDKRLTDLVRTEKGAVAVPQDFI ELS EFPETRS GKYMRRMVRVAVGEGEV  
GDASTLRNPESLDELARAVD GWKRRQSLSDTQALFER YRFFTIQYNLVAPGKRVATVTVKNPPVNALNERALDELVI IAEHLARKDDVA AVFTGSG  
TASFVAGADIRQMLEEVNSVEEAKALPDNAQLAFRTIEEMDKPCIAAIQGV ALGGGMEFALACHYRVAEPKARFGQPEINLRLLPGYGGTQRLPRL  
ADGGGETGLRDALD LILGGRADADAALAVGAVDALADGSDNALSHAHAMVREFVRS GDD SALGKAFAARKTQTQSWHEPASIDLDAVLEDEF LQRI  
LNQLEWAGRDKAGERALDAVRTGWTQGMTAGLECEAQRFAEAIIDPEGGK TGIQQFMDKQSPPLVRRDGVWEDDQHEATKTALIEAGD LPLGAPF  
YPGVTAI PPKQLAFGIARDPDTGAPRFGPPETHERELVNTPKPGANEAL IYLLSSEVNFNDI WALTGIPVSPFD AHDQVITGSGGLALVAALGS  
ELKEEGR LQVGD LVS VYSGTSEL LSPLAGDDPMYAGFAIQGYE TKTGSHAQFLTVQGPQLHRPPADLTLEQAGAYTLNLGTVARCLFTTLEIQAGK  
AFVEGSATGTGLDALKSSVRTGLAVTGLVSS EDRAEFVKSHG SVGAINRKDPEIADCFTPVPDDPDEARQWEADGEKLLDAYRETNGGKLADYVVVSH  
AGERAFPRSFQLLAEGGR LAFY GASSGYHFSFMGKGGEARPD EMLARANLRGGESVLLYYGPGSHEL ADEKGLEMVEAARLMKARMI VTTSDGQRE  
FLQSLGLEDAVEGIVSIEGLKRR L SDFHWPDTL PRLPDARTDIENFKI GVRAYQNTMKPFGTAVGKLLRSPGNPRGVPDLVIERAGQDTLGVSTSL  
VKPFGGRV IYAEEMAGRRYTFYAPQVWTRQRR IYMP SAEIFGTALCNAYEVTMMNEMVAAGL LDVTEPTMVPWEGLPEAHQAMW DNRHS GATVYVNH  
ALPAMGLTTKDELLEYVWAAQSDTGETS-

*Methylorubrum extorquens* Pcc

MGSSHHHHHHSSGLVPRGSHMKDILEKLEERRA QARLGGGKRL EAAHQHRKGLTARERIE LLLDHG SFEEFDMFVQHRSTDFGMEKQKIPGDGVVTVG  
WGTVNGRVTVFLSKDFTVFGGSLSEHAHAAKIVKVQDMALKMRAP IIGIFDAGGARIQEGVAALGGYGEVFRNVAASGVIPQISVIMGPCAGGDVYS  
PAMTDFIFMVRDTSYMFVTGPDVVKTVTNEVVTA EELGGAKVHTSKSS IADGSFENDVEA IILQIRRLD LDFLPANNIEGVPEIESFDDVNR LDKSLDT  
LIPDNPNKPYDMGELIRRVVDEGDFFEIQAAYARN IITGFGRVEGRTVGFVANQPLVLAGVLDSDASRKAARFVRFNCAFSIPIVTFVDVPGFLPGT  
AQEYGG LIKHGAKLLFAYSQATVPLVTIITRKA FGGAYDVMASKHV GADLNAYWPTAQI AVMGAKGAVEIIFRAEIGDADKIAERTKEYEDRFLSPF  
VAAERGYIDEVIMPHSTRKRIARALGLMLRTKEME QPWKHDNIPL-

MFDKILIANRGEIACRIIKTAQKMGIKTVAVYSDADRDAVHVMADEAVHIGPAPAAQSYLLIEKIIDACKQTGAQAVHPGYGFLSERESFPKALAE  
AGIVFIGPNPGAIAAMGDKIESKAAAAAEVSTVPFGLVIESPEHAVTIADEIGYPMIKASAGGGGKGMRIAESADEV AEGFARAKSEASSFGD  
DRVFVEKFI TDP RHIEIQVIGDKHGNV IYLGERECSIQRRNQVIEEAPSPLLEETRRKMGEQAVALAKAVNYDSAGTVEFVAGQDKS FYFLEMNT  
RLQVTEHPVTEMITGLDLVLELMIRVAAGEKLP L SQDQVKLDGWA VESRYAEDPTRNFLPSIGRLTTYQPEEGPLGGAIVRNDTGVEEGEIAIHYD  
PMIAKLV TWAPTRLEAIEAQATALDAFAIEGIRHNI PFLATLMAHPRWRDGR LSTGTFKEEFPEGFAIPEPEGFPVAHRLAAVAAAIDHKLNIRKRG I  
SGQMRDPSLLTFQRERVVLSGQRFNVTVDPDGDDLLVTFDDGTTAPVRSARWPGAPVWSGTVGDQSVAIQVRPLNLNGVFLQHAGAAAARVFTRE  
AELADLMPVKENAGSGKQLLCPMPGLVKQIMVSEGQEVKNGEPLAIVEAMKMENVLRAERDGTISKIAAEGD SLAVDAVILEFA-

*Staphylococcus schweitzeri* Dsr

MGSSHHHHHHSSGLVPRGSHMPKIVVVGAVAGGATCASQIRRLDKESDIIIFEKDRDMSFANCALPYVIGEVVEDRRLALAYTPEKIFYNRKQITVKT  
YHEVIAINDEKQTVSVLNRKTNEQFEESYDKLILSPGASANS LGFESDITFTLRNLEDTDAIDQFIKANQVDKVLVVGAGYVSLVLEVNLYERGLHP  
TLIHRSDKINKLMDADMNQPIDELDEKREIPYRLNEEIEAINGNEITFKSGKVEHYDMIIEGVGTHPNSKFI ESSNIKLRKGFIPVNDKFETNPN

IYAIGDIATSHYRHVDLPASVPLAWGAHRAASIVAEQIAGNDTIEFKGFLGNNIVKFFDYTFASVGVKPNELKQFDYKMEVETQGAHANYYPGNSPLHLRVYYDTTSRQILRAASVKGEGADKRIDVLSMAMMNQLTVDELTEFEVAYAPPYSHPKDLINMIGYKAK-

*Escherichia coli* KatE

MRGSHHHHHHTDPALRASQHNEKNPHQHQSPLHDSSEAKPGMDSLAPEDGSHRPAEPTPPGAQPTAPGSLKAPDTRNEKLNLSLEDVRKGSSENYALT  
TNQGVRIADDQNSLRAGSRGPTLLEDFILREKITHFDHERIPERIVHARGSAAHGYFQPYKSLSDITKADFLSDPNKITPVFVRFSTVQGGAGSADT  
VRDIRGFATKFFYTEEGIFDLVGNNTPIFFIQDAHKFPDFVHAVKPEPHWAIPQGGSAHDTFWDYVSLQPETLHNVMWAMSDRGI PRSYRTMEGFGIH  
TFRLINAEGKATFVRFWKPLAGKASLWDEAQKLTGRDPDFHRELEWAEIAGDFPEYELGFLIPEEDEFKFDFFLLDPTKLIPEELVPVQRVGK  
MVLNRPNDNFFAENEQAFAHPGHIVPGLDFTNDPLLQGRFLFSYTDQI SRLGGPNFHEIPINRFTCPYHNFQRDGMHRMGIDTNPANYEPNSINDNW  
PRETPPGKRGGFESYQERVEGNKVRERSPSFGEYYSHPRLFWLSQTPFEQRHIVDGFSELSKVVRPYIRERVVDQLAHIDLTLAQAVAKNLGIEL  
TDDQLNITPPPVDVNGLKKDPSLSLYAIPDGDVKGRVVAILLNDEVRSADLLAILKALKAKGVHAKLLYSRMGEVTTADDGTVLP IAAATFAGAPSLTVD  
AVIVPCGNIADIADNGDANYYLMEAYKHLKPIALAGDARKFKATIKIADQGEIEADSDGSMDELTLMAAHRVWSRI PKIDKI PAGLCGR-

*Mycolicibacterium vaccae* Fdh(D221A)

MAKVLCLVLYDDPVDGYPKTYARDLDPKIDHYPGGQILPTPKAIDFTPGQLLGSVSGELGLREYLESNGHTLVVTSDDKDPDSVFERELVDADVVISQ  
PFWPAYLTPERIAKAKNLKALTAGIGSDHVDLQSAIDRNVTVAEVTYCNSISVAEHVMMILSLVRNYLPSHEWARKGGWN IADCVSHAYDLEAMH  
VGTVAAGRIGLAVLRRALPFDVHLHYTARHRLPESVEKELNLTWHATREDMYPVCDVVTLNCPLHPETEHEMINDETLLKFKRGAYIVNTARGKLCDR  
DAVARALESGRLAGYAGVWFQPAKDHWPRTMPYNGMTPHISGTTTLTAQARYAAGTREILECFEGRPIRDEYLIYVQGGALAGTGAHSYSKGNAT  
GGSEAAKFKKAAENSSSVYRGAALAEHHHHHH-

*Escherichia coli* AhpFC

MGSSHHHHHHSQDPLDNTMKTQLKAYLEKLTTPVELIATLDDSAKSAEIKELLAIEAELSDKVTFKEDNSLPVRKPSFLITNPGSNQGRFAGSPLG  
HEFTSLVLALLWGGHPSKEAQSLLEQIRHIDGDFEFETYSLSCHNCPDVVQALNLSVLRNPKIKHTAIDGGTFQNEITDRNVMGVPAVFNKGEF  
GQGRMTLTIIVAKIDTGAEKRAEELNKRDAYDVLIVGSGPAGAAAAIYSARKGIRTLGMRERFGGQILDTVDIENIYISVPKTEGQKLAGALKVHVD  
EYDVVIDSQQSASKLIPAAVEGGLHQIETASGAVLKARSIIVATGAKWRNMNVPGEDQYRTKGVTYCPHCDGFLFKGRVAVI GGGNSGV EAAIDLA  
GIVEHVTLLEFAPEMKADQVLQDKLRSLKNVDIILNAQTTEVKGDSKVVGLYDRVSGDIHNIELAGIFVQIIGLLPNTNWLEGAVERNRMGEII  
DAKCEITNVKGVFAAGDCTTVPYKQII IATGEGAKASLSAFDYLI RTKTA-

MSLINTKIKPFKNQAFKNGEFIEITEKDTTEGRWSVFFFYPADFTFVCPTELGVDADHYEELQKLGVDVYAVSTDTHFTHKAWHSSSETIAKIKYAMI  
GDPTGALTRNFDNREDEGLADRATFVVDPPQIIQAIEVTAEGIGRSDASDLLRKAIAAQYVASHPGEVCPAKWKEGATLAPSLDLVGI-

*Escherichia coli* YjeF

MRGSHHHHHHTDPALRATDHTMKNPVSIPHTVWYADDIRGEREAADVGLTLYELMLRAGEAAFQVCRSAYPDARHWLVLCGHNGGDDGYVVAR  
LAKAVGIEVTLQAQESDKPLPEBAALAREAWLNAGGEIHASNIWVPEVDLIVDALLGTGLRQAPRESISQLIDHANSHPAPIVAVDI PSGLLAETG  
ATPGAVINADHTITFIALKPGLLTGKARDVTGQLHFDLSGLDLSWLAGQETKIQRFSAEQLSHWLKPRRPTSHKGDHGRVLIIGGDHGTAGAIRMTGE  
AALRAGAGLVRLTRSENIAPLLTPARPELMVHELTMDSLTESLEWADVIVIGPLGQQEWGKKALQKVENFRKPMWADALNLLAINPDKRHRNVI  
TPHPGEAARLLGCSVAEIESDRLHCAKRLVQRYGGVAVLKGAGTVVAAHPDALGIIDAGNAGMASGGMGDVLSGIIGALLGQKLSPYDAACAGCVAH  
GAAADVLAARFGRGMLATDLFSTLQRIVNPEVTDKNHDESSNAPGLCGR-

*Escherichia coli* CoaE

MRGSHHHHHHTDPALRARIYIVALTTGGIGSGKSTVANAFADLGINVIDADI IARQVVEPGAPALHAIADHFGANMIAADGTLQRRALRERIFANPEEK  
NWLNALHPLIQQETQHQQATSPYVLWVPLLVENSPLYKANRVLVVDVSPETQLKRTMQRDDVTREHVEQILAAQATREARLAVADDVIDNNGA  
PDAIASDVARLHAHYLQLASQVFSQEKPLCGR-

*Cereibacter sphaeroides* CsMcd

MGSSHHHHHSSGLVPRGSHMTGQPLLGDLLTASDALPEVEALFETARSALKERVTTDGKVSSKALEEEQFAAHALS WLATYVESLRQMRWAGRL  
ETEGRFGEALILQIAFGEYLAQIRGGIPMSQTE TARVQDIGIELGHGPEAVRRLIQAGNTPAARARLVALMRDNHGRATFGASGLDEELEMIRDQ  
FRRFADERVAPAHAGWHMRDELIPMEI VEALAE MGVFLTIPEEFGGFLSKASMVVVEELSRGYIGVGS LGTRSEIAAELILCGGTEAQKAWLP  
KLASGEILPTAVFTEPNTGSDLGSLRTRAVKDGDEWVHGNKTIWTHAARTHVMTLLARTDLETTDYRGLSMFLAEKVPGTADFPPTPGMTGGEIE  
VLGYRGMKEYEIGFDGFRVKAENLLGGVEGQGFQQLMQTFESARIQTAARAIGVAQNALEVGMQYAEERKQFGKALIEFPRVAGKLAMMAVEIMVAR  
QLTYHSAWEKDHGQRCDLEAGMAKLLGARVAWAAADNALQIHGGNGFALEYQISRI LCDARILNI FEGAAEQAQVIARRLLD-

*Paracoccus denitrificans* CsMcd

MGSSHHHHHSSGLVPRGSHMKMPAMPADTPSALLALAGEALPELESLSQRATEALRALVAPAGKQPALLEQHQAHAHALSWLTTTYVESIRQLSG  
WAGRLAEAGNLGRIEALILQIGLGEYLGQIAGGIPMSQTE FARLSDLELDWQGEAAA KLMRGNTAPARAELARLMQDNHGRATFGATGLDEDELEMI  
RDQFRRYAEBERVIPNAHEWHKQDLIPMEIIEELAE LGVFLTIPEEFGGFLSKASMVVVEELSRGYIGVGS LGTRSEIAAELILCGGTEAQKAK  
WLPGLASGEILSTAVFTEPNTGSDLGSLRTRAVRDGEDWVVTGNKTIWTHAARTHVMTLLARTDLETTDYRGLSMFLAEKPEGTDDDFPPTPGMTGG  
EIEVLGYRGMKEYELGFDGFRKGENLLGGEPGRGFKQLMETFESARIQTAARAIGVAQNALEVGMQYAEERKQFGKALIEFPRVAGKLAMMAVEIM  
IARQLTYFSAWEKDHGRCDLEAGMAKLLGARVAWAAADNALQIHGGNGFALEYAISRVLC DARILNI FEGAAEQAQVIARRLLD-

*Streptomyces albus* SaMcd

MGSSHHHHHSSGLVPRGSHMSRLAQTHGLTDIQQEILSTVRDFVDKEIIPVATELEHRDEYPTQIVEGLKELGLFLMIPEEYGGGLGESLLTYALC  
VEEIIARGWMSVSGIINTHFIVAYMLKQHGTEQREYFLPRMATGEVRFAGFMSSEPALGSDVSAISTKGVKVGDEYALTGQKMWLTNGSSSTLVAVLC  
RTDEGHPEGTAPHKSMTFFLVEKEPFGFEVVRPGLTI PGKIEKMGYKGVDTTEMLLDGLRI PANRVLGTTGRGFYQMMDGEVGRVNVVAARGCGVAQ  
RAFELGVSYAQQRHTFGKPIAQHQAIQFKLAEMATKVEAAHAMMVNAARKKDSGERNDLEAGMAKYLA SEYCKEVVEDAFRIHGGYGFSEKEYEIERL  
YREAPMLLIGEGTAEIQKMIIGRRLLEEYRFQG-

*Leptospira interrogans* LiMcd

MGSSHHHHHHSSGLVPRGSHMSAIKTIDQTTAKKALTVSAGVIEEVTKALAARCSVNGKVSVDKMDENQLVQYQIAWLTSEQRIAEKFIETAWDSSR  
GTGDLEQEMAVVFAAETVNHIRSEISSRPFSEYIKSSDLVSKIFNDEINQFLENAMAIQNYNEIAEKIVAKGHFGAYGLDEDEHEMFRETFFKFAEDV  
VIPHAHVHRHDDIIPEDIIGGLKEMGCFGLCIPESYGGIQPNKPDNLMLVVTTEELSRGGLGIAGSLITRPEIMSKALLKGGTQEQQDKWLPPLLA  
SGERMAGIMVTEPNYGSVDVAGSVTAKPANGGWVINGVKTWCTFAGYANLLLLILCRTESDPSLKHKGLSILLAEKPTFTGHEFTYTQPEGGKIEGKA  
IGTIYGRGMHSFEVSDNYFVPAENLLGGEAGRGKGFYQMEGFAGGRIQTAARAHGVMQAALAEALRYARERAVFQKPIIYENLTKYKIARMAVIL  
QASRQYANHVANLLDNHKGQMEATLIKFYASKVAEWWTREAMQIHGGMGYAEYAVSRVFVDARVFSIFEGAEVVMALRVIKASLMDQYSAS-

*Wenxinia marina* WmMcd

MGSSHHHHHHSSGLVPRGSHMAHDGQDASTDAVLGGLTDLTRAALAPVADVLEEATAAVKRRIGNGPLDAQQDAAHGLSWLATYGRALQQMQGWADR  
LEEQGRLGEAEQLVQLIAFGEYLAQIQGGIPMSQGEIVRLEALGADPSPLDADPVRRLIAEGNSDAARLRLAALLAERGGDCAASGLDDEMIMIRDQ  
FRRFAAEKVEPFAHDWHLKDELIPMALIEELSEMVGFLTIPEEYGGGLPKTAMAVVSEELSRGYIGVGSGLTRSEIAAELILGGGTEAQKAHWLP  
KIASGAVLPTAVFTEPNTGSDLGALRTRAVPDGEGWRITGNKTWITHAARAGLMTLLARTDPETDDYRGLSMFLAEKTPGTDAEFPDAGLTGGEIG  
VLGYRGMKEYELAFDGFVSGDGLLGGAPGTGFKQLMQTFESARIQTAARAVGVAQAALDVALSYAQERRQFGRPLIAFPRVAGKLAMMAAEIMVAR  
QLTYHSAREKDAGHRCDLEAGMAKLLAARVAVAAAADNLQIHGGNGFALEYRISRLLCDARILNIFEGAAEQIQAQVIARRLLG

*Frankia* sp. FsMcd

MGSSHHHHHHSSGLVPRGSHMGRIAQTDLGTLTDVQTDILAAVTRFVDKEILPHANELEKDEFDPDAIVEAMKEMGLFGITIPYQYGGGLGESLLTYALV  
VEEIARGWMSVSGVINHTFIVAYLVLQHGTEEQRQLLPKMATGEVRGAFMSSEPGCGSDVSAITTRADRDGDDYVINGQKMWLTNGARAGVVATLV  
KTDEGADSVYRNMTTFLEKEPGFGTHGGITIPGKLDKLGKGVETTEMILDGHRTPASSILGGPEAAGRGFYQMMDGVEVGRVNVAAARACGMIRA  
FELAIAYAQQRRFTFGHQIADHQAIATFKLADMATKVEAGHLMVSAARKKDSQRNDVEAGMAKYLASEYCHEVTTESFRIHGYYGYSKEYEIERLYR  
EAPFMLIGEGTSEVQKRIISRALLKEYKLPG-

*Erythrobacter litoralis* ElMcd

MGSSHHHHHHSSGLVPRGSHMSDWIECANDAAAAARDFAETVRLRVHERVAPGGHVDADLVTLQHAVHGFAWIAATTAALAEATVDWAKRARSQGHF  
GRVEELTLRIGFGEYCVQLVSGVPMASAGEIVRQQALGVSVVAAAMASDPAVARFLKDGNTPETRAEFAALLAEGARPEDEGLDETDLVRAQFRAFT  
ADRIAPHAGHWHLADALI PAEVI AEMAQLGVFGVCIDEKYGGGLGKGLAMSVVSEELSRGWICAGSLGTRSEIAGELI GENGTEAQKAHWLPRADG  
SVLPTAVFTEPDTGSDLASVTRARRQADGTWRVDGAKTWITHAARADLMTLIARTDPDAPGYKGLSMFLAAKTRGSDADPFDPDGDGSEIEVLGY  
RGMKEYALGFDGFAVAGDGLLGGAEQGQFKQLMRTFEGARIQTAARAVGVAWNAFDLALDYAMGRQFSEPLTAFPRVADKLAMMATETVMSRELTY  
YAARAKDRGARCDIEAGMAKLLAARTAWAADNAVQIHGGNGYALEYPI SRVLC DARILNIFEGAAEQIQAQVIARGLLAAQAPPREAEFVRQSA-

*Caulobacter vibrioides* CvMcd

MGSSHHHHHHSSGLVPRGSHMTTIIARDDAENLVLPGLTGLLREAADATALFVAEAKPAVLAHIAPEGGKVDKRLADVHQHRVHGYWYAAAYAE LLN  
QVAGWAERLEAERGFGEIEALLAQLLFSEYCAQLVGGVPMNQGEIIRPAHLVEDPAI LARLSSAAATLIAEGGTQAVKSRVAQRLEAERGRPTLEH  
TGLDET FEMIR DQFHAFABEKVTPFAHEWHLKDELIP IELVEELGALGVFGILTIP EEEYGGSGMGKTAMCVVSEELSRRAWI GVGSLATRSEIAGELIL  
TGTEEQKQYWLPKIASAEILPTAVFTEPNTGSDLGALRTRAE LKGDHYVVTGNKTWITHAARADVMTLLVTRDPATDYRGLSMLLAPKPRGTDEA  
PFAEGMSGGEIGVIGYRGMKEYELGFDGFTVPAENLLGGAPGQGFQKQLMATFESARIQTAARAVGVAQAALVGLGYALDRKQFGQAI FAFPRVAN  
KLAMMAEIMGVRQLTYFAARQKDEGKRCLEAGMAKLLAARVAVAAAADNALQIHGGNGFAMEYASRLLADARILNIFEGAGEIQAQVIARRLLDG  
GN-

*Bacterium* HR19 HrMcd

MGSSHHHHHHSSGLVPRGSHMEVIRDGKFYEEIRRQVREFAESEVKPIAHKYDREDKDI PWDVLKMAELGYFGILVPEEWGGLGLDYMSMAI VAAE  
LSRVWLSVGSVMTRNLIAETLLLNNGLEEQKKYLPSLARGEI FAAAAFTEPNAGSDTAGMKLKA EKVKGGWILNGTKTWCTFANRANILVVLARTD  
PNPFPKRLGLSIFIVEKEPSEAHEKIKHPNIHGELIETVGYHGMHCWTLHFEDCFVPDENLLGGE PGKGFYQLMATYESARIQTAARAIGVAQGAFE  
LAVKYAKERYQFGKPIADFQLIRSKLAKMPTYIEAARQLTYACRMKDTGKRCDEAGMAKLF AAEMVEYVTSEAMQIFGGYGSKEYEIERYWRDG  
RLFKIFEGTSEIQEEVIAKRLLEIY-

*Cupriavidus necator* Act

MGSSHHHHHHSSGLVPRGSHMTDVVIVSAARTAVGKFGGSLAKI PAPELGAVV IKAALERAGVKPEQVSEVIMQVLTAGSGQNPARQAAIKAGLPA  
MVPAMTINKVCGSGLKAVMLAANAIMAGDAEIVVAGGQENMSAAPHVLPFSRDGFRMGDAKLVDTMIVDGLWDVYNQYHMGITAE NVAKEYGITRETA  
QDEFVAGSQNKAEAAQKAGKDFDEEIVPVLIPQRKGDPAVKTDEFVQRGATLDSMSGLKPAFDKAGTVTAANASGLNDGAAAVVMSAAKAKELGLT  
PLATIKSYANAGVDPKVMGMGPVASKRALRAEWTPQDLDLMEINEFAAQAALAVHQMGWDT SKVNVNGGAIAIGHPIGASGCRILVTLHEMKR  
RDAKGLASL CIGGGMGVALAVERK-

*Cupriavidus necator* Pct

MGSSHHHHHHSSGLVPRGSHMKVITAREAAALVQDGTWASAGFVAGHAEAVTEALEQRFLQSGLPRLDTLVYSAGQDGRGARGVNHFGNAGMTAS  
IVGGHRSATRLATLAMAECYGNLPGVLTLYRAIAGGKPGVMTKIGLHFTVDPRTAQDARYHGGAVNERARQAIAGGKACWVDAVDFRGE EYL  
FYPSFPIHCALIRCTAADTRGNLSTHREAFHHELLAMAQA AHNSSGIVIAQVESLVDHHEILQAIHVPGILVDYVVVCDNPNANHQMTFAESYNPAYV  
TPWQGEAAVVEAEATPVAAGPLDARTIVQRRAVMELARRAPRVNVLGVMPAAVGM LAHQAGLDGFTLTVEAGPIGGTPADGLSFGASAYPEAVVDQ  
PAQDFDYEGGGIDLAILGLAELDGHGNVNSKFGEGEGAS IAGVGGFINITQSARAVVFMGTLTAGGLEVRAGEGRQLQIVREGRVKKIVPEVSHLSF  
NGPYVASLGIPVLYITERAVFEMRAGAGGEARLTLVEIAPGVLDQRDVLQCATPVAVAPDLREMDARLFQAGPLHL-

*Anaerotignum propionicum* βct

MGHHHHHHHHSSGHIEGRHMLEMRKVP IITADEAAKLIKDGDTVTTS GFVGNAIPEALDRAVEKRFLETGEPKNITVYVCGSQGNRDGRGAEHFA  
HEGLLKRYIAGHWATVPALGKMAMENKMEAYNVSQGALCHLFRDIASHKPGVFTKVGIGTFIDPRNGGKVN DITKEDIVELVEIKGQEYLFYPAFF

IHVALIRGTYADESGNITFEKEVAPLEGT SVCQAVKNSGGIVVVQVERVVKAGTLDPRHVKVPGIYVDYVVVADPEDHQQSLDCEYDPALSGEHRP  
EVVGEPLPLSAKKVIGRRGAI ELEKDVAVN LGVGAPEYVASVADEEGIVDFMTLTAESGAIGGVPAGGVRFGASYNADALIDQGYQFDYYDGGGLDL  
CYLGLAECDEKGNINVSFRFGPRIAGCGGFINITQNTPKVFFCGTFTAGGLKVKIEDGKVIIVQEGKQKFLKAVEQITFNGDVALANKQVITYITER  
CVFLLKEDGLHLSEIAPGIDLQTQILDVMDFAPIIDRDANGQIKLMDAALFAEGLMGLKEMKS-

## REFERENCES AND NOTES

1. T. Schwander, L. Schada von Borzyskowski, S. Burgener, N. S. Cortina, T. J. Erb, A synthetic pathway for the fixation of carbon dioxide in vitro. *Science* **354**, 900–904 (2016).
2. T. J. Erb, J. Zarzycki, A short history of RubisCO: The rise and fall (?) of Nature's predominant CO<sub>2</sub> fixing enzyme. *Curr. Opin. Biotechnol.* **49**, 100–107 (2018).
3. S. Santos Correa, J. Schultz, K. J. Lauersen, A. Soares Rosado, Natural carbon fixation and advances in synthetic engineering for redesigning and creating new fixation pathways. *J. Adv. Res.* **47**, 75–92 (2023).
4. E. T. Wurtzel, C. Vickers, A. D. Hanson, A. H. Millar, M. Cooper, K. P. Voss-Fels, P. I. Nickel, T. J. Erb, Revolutionizing agriculture with synthetic biology. *Nat. Plants* **5**, 1207–1210 (2019).
5. T. J. Erb, Carboxylases in natural and synthetic microbial pathways. *Appl. Environ. Microbiol.* **77**, 8466–8477 (2011).
6. A. Bar-Even, E. Noor, N. E. Lewis, R. Milo, Design and analysis of synthetic carbon fixation pathways. *Proc. Natl. Acad. Sci. U.S.A.* **107**, 8889–8894 (2010).
7. C. A. Cotton, C. Edlich-Muth, A. Bar-Even, Reinforcing carbon fixation: CO<sub>2</sub> reduction replacing and supporting carboxylation. *Curr. Opin. Biotechnol.* **49**, 49–56 (2018).
8. H. Yu, X. Li, F. Duchoud, D. S. Chuang, J. C. Liao, Augmenting the Calvin-Benson-Bassham cycle by a synthetic malyl-CoA-glycerate carbon fixation pathway. *Nat. Commun.* **9**, 2008 (2018).
9. X. Lu, Y. Yang, S. Wang, Q. Wang, X. Wang, Z. Yan, J. Cheng, C. Liu, X. Yang, H. Luo, S. Yang, J. Gou, L. Ye, L. Lu, Z. Zhang, Y. Guo, Y. Nie, J. Lin, S. Li, C. Tian, T. Cai, B. Zhuo, H. Ma, W. Wang, Y. Ma, Y. Liu, Y. Li, H. Jiang, Constructing a synthetic pathway for acetyl-coenzyme A from one-carbon through enzyme design. *Nat. Commun.* **10**, 1378 (2019).
10. J. B. Siegel, A. B. Smith, S. Poust, A. J. Wargacki, A. Bar-Even, C. Louw, B. W. Shen, C. B. Eiben, H. M. Tran, E. Noor, J. L. Gallaher, J. Bale, Y. Yoshikuni, M. H. Gelb, J. D. Keasling, B. L. Stoddard, M. E. Lidstrom, D. Baker, Computational protein design enables a novel one-carbon assimilation pathway. *Proc. Natl. Acad. Sci. U.S.A.* **112**, 3704–3709 (2015).

11. S. Luo, P. P. Lin, L.-Y. Nieh, G.-B. Liao, P.-W. Tang, C. Chen, J. C. Liao, A cell-free self-replenishing CO<sub>2</sub>-fixing system. *Nat. Catal.* **5**, 154–162 (2022).
12. A. Pandi, C. Diehl, A. Y. Kharrazi, S. A. Scholz, E. Bobkova, L. Faure, M. Nattermann, D. Adam, N. Chapin, Y. Foroughijabbari, C. Moritz, N. Paczia, N. S. Cortina, J.-L. Faulon, T. J. Erb, A versatile active learning workflow for optimization of genetic and metabolic networks. *Nat. Commun.* **13**, 3876 (2022).
13. J. Zarzycki, G. Fuchs, Coassimilation of organic substrates via the autotrophic 3-hydroxypropionate bi-cycle in *Chloroflexus aurantiacus*. *Appl. Environ. Microbiol.* **77**, 6181–6188 (2011).
14. J. Zarzycki, V. Brecht, M. Müller, G. Fuchs, Identifying the missing steps of the autotrophic 3-hydroxypropionate CO<sub>2</sub> fixation cycle in *Chloroflexus aurantiacus*. *Proc. Natl. Acad. Sci. U.S.A.* **106**, 21317–21322 (2009).
15. M. Hügler, C. Menendez, H. Schägger, G. Fuchs, Malonyl-coenzyme A reductase from *Chloroflexus aurantiacus*, a key enzyme of the 3-hydroxypropionate cycle for autotrophic CO<sub>2</sub> fixation. *J. Bacteriol.* **184**, 2404–2410 (2002).
16. C. Liu, Q. Wang, M. Xian, Y. Ding, G. Zhao, Dissection of malonyl-coenzyme A reductase of *Chloroflexus aurantiacus* results in enzyme activity improvement. *PLOS ONE* **8**, e75554 (2013).
17. Y. Nakano, H. Tokunaga, S. Kitaoka, Two omega-amino acid transaminases from *Bacillus cereus*. *J. Biochem.* **81**, 1375–1381 (1977).
18. O. Hayaishi, Y. Nishizuka, M. Tatibana, M. Takeshita, S. Kuno, Enzymatic studies on the metabolism of  $\beta$ -Alanine. *J. Biol. Chem.* **236**, 781–790 (1961).
19. A. Hördt, M. G. López, J. P. Meier-Kolthoff, M. Schleuning, L.-M. Weinhold, B. J. Tindall, S. Gronow, N. C. Kyrpides, T. Woyke, M. Göker, Analysis of 1,000+ type-strain genomes substantially improves taxonomic classification of *Alphaproteobacteria*. *Front. Microbiol.* **11**, 468 (2020).
20. G. Herrmann, T. Selmer, H. J. Jessen, R. R. Gokarn, O. Selifonova, S. J. Gort, W. Buckel, Two beta-alanyl-CoA:ammonia lyases in *Clostridium propionicum*. *FEBS J.* **272**, 813–821 (2005).

21. P. N. Green, J. K. Ardley, Review of the genus *Methylobacterium* and closely related organisms: A proposal that some *Methylobacterium* species be reclassified into a new genus, *Methylorubrum* gen. nov. *Int. J. Syst. Evol. Microbiol.* **68**, 2727–2748 (2018).
22. T. J. Erb, V. Brecht, G. Fuchs, M. Müller, B. E. Alber, Carboxylation mechanism and stereochemistry of crotonyl-CoA carboxylase/reductase, a carboxylating enoyl-thioester reductase. *Proc. Natl. Acad. Sci. U.S.A.* **106**, 8871–8876 (2009).
23. T. Tsuge, K. Taguchi, T. Seiichi, Y. Doi, Molecular characterization and properties of (R)-specific enoyl-CoA hydratases from *Pseudomonas aeruginosa*: Metabolic tools for synthesis of polyhydroxyalkanoates via fatty acid beta-oxidation. *Int. J. Biol. Macromol.* **31**, 195–205 (2003).
24. I. Bernhardsgrütter, B. Vögeli, T. Wagner, D. M. Peter, N. S. Cortina, J. Kahnt, G. Bange, S. Engilberge, E. Girard, F. Riobé, O. Maury, S. Shima, J. Zarzycki, T. J. Erb, The multicatalytic compartment of propionyl-CoA synthase sequesters a toxic metabolite. *Nat. Chem. Biol.* **14**, 1127–1132 (2018).
25. I. Bernhardsgrütter, K. Schell, D. M. Peter, F. Borjian, D. A. Saez, E. Vöhringer-Martinez, T. J. Erb, Awakening the sleeping carboxylase function of enzymes: Engineering the natural CO<sub>2</sub>-binding potential of reductases. *J. Am. Chem. Soc.* **141**, 9778–9782 (2019).
26. L. V. Chistoserdova, M. E. Lidstrom, Molecular characterization of a chromosomal region involved in the oxidation of acetyl-CoA to glyoxylate in the isocitrate-lyase-negative methylotroph *Methylobacterium extorquens* AM1. *Microbiol. Read. Engl.* **142**, 1459–1468 (1996).
27. T. J. Erb, J. Rétey, G. Fuchs, B. E. Alber, Ethylmalonyl-CoA mutase from *Rhodobacter sphaeroides* defines a new subclade of coenzyme B<sub>12</sub>-dependent acyl-CoA mutases. *J. Biol. Chem.* **283**, 32283–32293 (2008).
28. D. Padovani, R. Banerjee, Assembly and protection of the radical enzyme, methylmalonyl-CoA mutase, by its chaperone. *Biochemistry* **45**, 9300–9306 (2006).
29. E. Hidber, E. R. Brownie, K. Hayakawa, M. E. Fraser, Participation of Cys123 $\alpha$  of *Escherichia coli* succinyl-CoA synthetase in catalysis. *Acta Crystallogr. D Biol. Crystallogr.* **63**, 876–884 (2007).

30. L. V. Chistoserdova, M. E. Lidstrom, Genetics of the serine cycle in *Methylobacterium extorquens* AM1: Identification, sequence, and mutation of three new genes involved in C1 assimilation, orf4, mtkA, and mtkB. *J. Bacteriol.* **176**, 7398–7404 (1994).
31. S. Besteiro, M. Biran, N. Biteau, V. Coustou, T. Baltz, P. Canioni, F. Bringaud, Succinate secreted by *Trypanosoma brucei* is produced by a novel and unique glycosomal enzyme, NADH-dependent fumarate reductase. *J. Biol. Chem.* **277**, 38001–38012 (2002).
32. G. Cecchini, I. Schröder, R. P. Gunsalus, E. Maklashina, Succinate dehydrogenase and fumarate reductase from *Escherichia coli*. *Biochim. Biophys. Acta* **1553**, 140–157 (2002).
33. J. Zarzycki, A. Schlichting, N. Strychalsky, M. Müller, B. E. Alber, G. Fuchs, Mesoconyl-coenzyme A hydratase, a new enzyme of two central carbon metabolic pathways in bacteria. *J. Bacteriol.* **190**, 1366–1374 (2008).
34. S. Wischgoll, U. Demmer, E. Warkentin, R. Günther, M. Boll, U. Ermler, Structural basis for promoting and preventing decarboxylation in glutaryl-coenzyme a dehydrogenases. *Biochemistry* **49**, 5350–5357 (2010).
35. R. J. Usselman, A. J. Fielding, F. E. Frerman, N. J. Watmough, G. R. Eaton, S. S. Eaton, Impact of mutations on the midpoint potential of the  $[4\text{Fe-4S}]^{+1,+2}$  cluster and on catalytic activity in electron transfer flavoprotein-ubiquinone oxidoreductase (ETF-QO). *Biochemistry* **47**, 92–100 (2008).
36. L. Tong, Acetyl-coenzyme A carboxylase: Crucial metabolic enzyme and attractive target for drug discovery. *Cell. Mol. Life Sci. CMLS* **62**, 1784–1803 (2005).
37. L. Diacovich, D. L. Mitchell, H. Pham, G. Gago, M. M. Melgar, C. Khosla, H. Gramajo, S. C. Tsai, Crystal structure of the beta-subunit of acyl-CoA carboxylase: Structure-based engineering of substrate specificity. *Biochemistry* **43**, 14027–14036 (2004).
38. S. Mordhorst, J. Singh, M. K. F. Mohr, R. Hinkelmann, M. Keppler, H. J. Jessen, J. N. Andexer, Several polyphosphate kinase 2 enzymes catalyse the production of adenosine 5'-polyphosphates. *Chembiochem.* **20**, 1019–1022 (2019).



39. K. Hoelsch, I. Sührer, M. Heusel, D. Weuster-Botz, Engineering of formate dehydrogenase: Synergistic effect of mutations affecting cofactor specificity and chemical stability. *Appl. Microbiol. Biotechnol.* **97**, 2473–2481 (2013).
40. A. Y. Marbaix, G. Noël, A. M. Detroux, D. Vertommen, E. Van Schaftingen, C. L. Linster, Extremely conserved ATP- or ADP-dependent enzymatic system for nicotinamide nucleotide repair. *J. Biol. Chem.* **286**, 41246–41252 (2011).
41. S. B. delCardayre, K. P. Stock, G. L. Newton, R. C. Fahey, J. E. Davies, Coenzyme A disulfide reductase, the primary low molecular weight disulfide reductase from *Staphylococcus aureus*. Purification and characterization of the native enzyme. *J. Biol. Chem.* **273**, 5744–5751 (1998).
42. C. Wadler, J. E. Cronan, Dephospho-CoA kinase provides a rapid and sensitive radiochemical assay for coenzyme A and its thioesters. *Anal. Biochem.* **368**, 17–23 (2007).
43. E. Gasteiger, C. Hoogland, A. Gattiker, A. Duvaud, M. R. Wilkins, R. D. Appel, A. Bairoch, Protein identification and analysis tools on the ExPASy server, in *The Proteomics Protocols Handbook*, J. M. Walker, Ed. (Humana Press, 2005), pp. 571–607.
44. E. Rodríguez, H. Gramajo, Genetic and biochemical characterization of the  $\alpha$  and  $\beta$  components of a propionyl-CoA carboxylase complex of *Streptomyces coelicolor* A3(2) The GenBank accession numbers for the *accA1*, *aacA2* and *pccB* sequences determined in this work are AF113603, AF113604 and AF113605, respectively. *Microbiol. Read. Engl.* **145**, 3109–3119 (1999).
45. D. M. Peter, B. Vögeli, N. S. Cortina, T. J. Erb, A chemo-enzymatic road map to the synthesis of CoA Esters. *Mol. Basel Switz.* **21**, 517 (2016).
46. G. L. Ellman, Tissue sulfhydryl groups. *Arch. Biochem. Biophys.* **82**, 70–77 (1959).
47. S. Herter, A. Busch, G. Fuchs, L-malyl-coenzyme A Lyase/ $\beta$ -methylmalyl-coenzyme A lyase from *chloroflexus aurantiacus*, a bifunctional enzyme involved in autotrophic CO<sub>2</sub> fixation. *J. Bacteriol.* **184**, 5999–6006 (2002).

48. T. J. Erb, L. Frerichs-Revermann, G. Fuchs, B. E. Alber, The apparent malate synthase activity of *Rhodobacter sphaeroides* is due to two paralogous enzymes, (3*S*)-Malylyl-coenzyme A (CoA)/ $\beta$ -methylmalylyl-CoA lyase and (3*S*)- Malylyl-CoA thioesterase. *J. Bacteriol.* **192**, 1249–1258 (2010).
49. M. Kronen, I. A. Berg, Mesaconase/Fumarase FumD in *Escherichia coli* O157:H7 and promiscuity of *Escherichia coli* class I Fumarases FumA and FumB. *PLOS ONE* **10**, e0145098 (2015).
50. L. Xiao, G. Liu, F. Gong, H. Zhu, Y. Zhang, Z. Cai, Y. Li, A minimized synthetic carbon fixation cycle. *ACS Catal.* **12**, 799–808 (2022).
51. N. L. Gale, J. V. Beck, Evidence for the Calvin cycle and hexose monophosphate pathway in *thiobacillus ferrooxidans*. *J. Bacteriol.* **94**, 1052–1059 (1967).
